# Supplementary material for: Exploring digital competencies in higher education: design and validation of instruments for the era of Industry 5.0
Source: Frontiers journal article supplement (doi:10.3389/feduc.2024.1415800), 2024-10-09
Supplement: Table_1.XLSX [file Table_1.XLSX]

## Sheet: DatabaseSLRFINAL
Number	Author(s)	Document title	Instrumento O DIMENSION O AREA	TRAE EL INSTRUMENTO	Type of access	Year	Journal	DOI	APA format	Abstracts	Keywords	Language	Type of access	What is the number and distribution of studies across countries that pertain to the design of measurement instruments for digital literacy?	Which countries exhibit the most significant academic contributions to the field of digital literacy?	Which scholarly institutions or organizations are responsible for disseminating these studies?	What forms of digital literacy have been highlighted as pertinent in the studies under review?	What are the predominant keywords and concepts across the studies identified on digital literacy?	Who are the preeminent authors whose contributions have significantly shaped the discourse in digital literacy?	RQ1 Between 2013 and 2023, how many studies on assessing digital competencies in higher education were published, and what type of access characterizes these studies?	RQ1 Between 2013 and 2023, how many studies on assessing digital competencies in higher education were published, and what type of access characterizes these studies?	RQ2 In which countries have the studies on this topic been conducted?	RQ3 Which universities have conducted studies related to the topic?	RQ4 What populations have been studied in digital competency research?	RQ5 Which instruments were used in the studies? What are the instrument's dimensions and item count? Was it designed for the study's context, adapted, or validated? (INSTRUMENT)	RQ5 Which instruments were used in the studies? What are the instrument's dimensions and item count? Was it designed for the study's context, adapted, or validated? (Dimensions)	RQ5 Which instruments were used in the studies? What are the instrument's dimensions and item count? Was it designed for the study's context, adapted, or validated? (ITEMS)	RQ5 Which instruments were used in the studies? What are the instrument's dimensions and item count? Was it designed for the study's context, adapted, or validated? (DESIGN, ADAPTATION OR VALIDATION)	RQ6 What types of reliability have been reported in studies on assessing digital competencies in higher education from 2013 to 2023? (Internal consistency)	RQ6 What types of reliability have been reported in studies on assessing digital competencies in higher education from 2013 to 2023? (Split-half reliability)	RQ6 What types of reliability have been reported in studies on assessing digital competencies in higher education from 2013 to 2023? (Test-retest)	RQ7 What types of validity have been reported in studies on assessing digital competencies in higher education from 2013 to 2023?(Content validity)	RQ7 What types of validity have been reported in studies on assessing digital competencies in higher education from 2013 to 2023?(Construct validity)	RQ7 What types of validity have been reported in studies on assessing digital competencies in higher education from 2013 to 2023?(Criterion validity)	RQ7 What types of validity have been reported in studies on assessing digital competencies in higher education from 2013 to 2023?(Face validity)	RQ8 Do higher education digital competency instruments include Industry 5.0 core competencies? (Dimensions of isntruments)	RQ8 Do higher education digital competency instruments include Industry 5.0 core competencies? (Creativity)	RQ8 Do higher education digital competency instruments include Industry 5.0 core competencies? (Critical Thinking)	RQ8 Do higher education digital competency instruments include Industry 5.0 core competencies? (Collaboration)	RQ8 Do higher education digital competency instruments include Industry 5.0 core competencies? (Communication)
1	Alagözlü, Nuray; Koban Koç, Didem; Ergül, Hatice; Bağatur, Sümeyra;	News media literacy skills and violence against women in news reporting in Turkey: instrument development and testing	SI	El documento detalla el desarrollo y la validación de un cuestionario de alfabetización mediática en noticias, que se diseñó para identificar los niveles de alfabetización mediática de los estudiantes universitarios relacionados con las noticias sobre violencia contra las mujeres. El cuestionario se compone de 16 preguntas divididas en tres categorías: conciencia, análisis y juicio. Esto indica q…	Limited	2019	Gender, Technology and Development	https://doi.org/10.1080/09718524.2019.1672296	Alagözlü, N., Koban Koç, D., Ergül, H., & Bağatur, S. (2019). News media literacy skills and violence against women in news reporting in Turkey: instrument development and testing. Gender, Technology and Development, 23(3), 293-313.	The purpose of the present study was twofold: The first was to determine the validity and reliability of a news media literacy questionnaire that was developed to identify college students’ literacy levels related to media and news about violence against women. The existing literature about media literacy shows that there is a lack of evaluation instrument of this kind. The study aimed to determi…	News media literacyViolence against womenquestionnaireperceptionreliabilityvalidity		Limited	2019	Turkey	Hacettepe University	News media literacy skills and violence against women	News media literacyViolence against womenquestionnaireperceptionreliabilityvalidity	Alagözlü, Nuray; Koban Koç, Didem; Ergül, Hatice; Bağatur, Sümeyra;	2019	Limited	Turkey	Hacettepe University	University students	News media literacy instrument	1. Awareness 2. Analysis 3. Judgment	16 items	Design and validation	Cronbach's Alpha (0.70)	NM	Yes	Yes	NM	NM	NM	1. Awareness 2. Analysis 3. Judgment	Creativity	Critical thinking	Unrelated	Unrelated
2	Alarcón, R., Jiménez, E. del P., & de Vicente-Yagüe, M. I.	Development and validation of the DIGIGLO, a tool for assessing the digital competence of educators	SI	Sí, el documento contiene el instrumento completo del estudio, que es el cuestionario DIGIGLO compuesto por 29 ítems. Cada ítem se evalúa utilizando una escala tipo Likert de seis categorías, abarcando ocho áreas de competencia digital. Este instrumento fue diseñado para valorar la competencia digital de los educadores en base a un modelo que incluye tanto las competencias propuestas por el marco…	Open Access	2020	British Journal of Educational Technology	https://doi.org/10.1111/bjet.12919	Alarcón, R., Del Pilar Jiménez, E., & de Vicente‐Yagüe, M. I. (2020). Development and validation of the DIGIGLO, a tool for assessing the digital competence of educators. British Journal of Educational Technology, 51(6), 2407-2421.	Educators must be able to adapt to the opportunities provided by information and communication technologies, making use of those which are best suited to meeting their students' needs and identifying areas of practice in which they themselves need to develop their skills. The European Framework for the Digital Competence of Educators (DigCompEdu) proposes 22 basic competences, organised into six …	NA	English	Open Access	2020	Spain, Mexico, Chile, Peru, Ecuador, Venezuela, Argentina, Colombia	University of Málaga	Digital Competence of Educators (DigCompEdu): professional engagement, digital resources, teaching and learning, assessment, empowering learners, facilitating learner's digital competence	NA	Alarcón R.; del Pilar Jiménez E.; de Vicente-Yagüe M.I.	2020	Open Access	Spain, Mexico, Chile, Peru, Ecuador, Venezuela, Argentina, Colombia	University of Málaga	Professors	DIGIGLO	1. Professional Engagement 2. Digital Resources 3. Teaching and Learning 4. Assessment, Empowering Learners 5. Facilitating Learners' Digital 6. Digital Environment 7. Extrinsic Digital Engagement.	29 items	Design and validation	Cronbach's Alpha (0.913-0.961)	NM	NM	NM	CFA	NM	NM	1. Professional Engagement 2. Digital Resources 3. Teaching and Learning 4. Assessment, Empowering Learners 5. Facilitating Learners' Digital 6. Digital Environment 7. Extrinsic Digital Engagement.	Unrelated	Critical thinking	Unrelated	Unrelated
3	Arroba-Freire, E., Bonilla-Jurado, D., Guevara, C., & Ramírez-Casco, A.	Factor Analysis: An Application of the Digital Competencies Questionnaire in Students of the Business Administration Career of the Instituto Tecnológico Superior España (ISTE)	SI	Sí, el documento incluye el cuestionario completo de competencias digitales utilizado en el estudio. Este cuestionario consta de preguntas relacionadas con el perfil de usuario, teléfonos móviles y videojuegos, Web 2.0, y la composición de una competencia digital.	Open Access	2022	Journal of Higher Education Theory and Practice	NA	Arroba-Freire, E., Bonilla-Jurado, D., Guevara, C., & Ramírez-Casco, A. (2022). Factor Analysis: An Application of the Digital Competencies Questionnaire in Students of the Business Administration Career of the Instituto Tecnológico Superior España (ISTE). Journal of Higher Education Theory and Practice, 22(18), 199-209.	The purpose of this research was to perform an exploratory factorial analysis of the digital competencies questionnaire in students. A cross-sectional observational design was applied to 322 students of the Tecnológico Superior Universitario España from the 4th and 5th cycles of the Business Administration career. It was obtained that the basic assumption of the factor analysis of the Kaiser-Meye…	NA	English	Open Access	2022	Spain	Instituto Tecnológico Superior España	Digital competencies: a) Digital literacy; b) Accessing digital information; c) Using digital information; d) Creating digital information and media; e) Communicating digital information; f) Managing digital information; and g) Evaluating digital information	factor analysis, higher education, digital competencies questionnaire, business administration, technological institutes	Arroba-Freire, Edison;Bonilla-Jurado, Diego;Guevara, Cesar;Ramírez-Casco, Andrea	2022	Open Access	Spain	Instituto Tecnológico Superior España	University students	Digital Competencies Questionnaire developed by García (2016)	1. User Profile 2. Cell Phones and Video Games 3. Web 2.0 4. Composition of a Digital Competence.	9 items	Validation	NM	NM	NM	NM	EFA	NM	NM	1. User Profile 2. Cell Phones and Video Games 3. Web 2.0 4. Composition of a Digital Competence.	Unrelated	Unrelated	Unrelated	Communication
4	Arslantas, T. K., & Gul, A.	Digital literacy skills of university students with visual impairment: A mixed-methods analysis	SI	Sí, el documento describe el uso de un cuestionario en línea que incluye preguntas demográficas y la Escala de Alfabetización Digital (DL Scale), así como entrevistas semiestructuradas para recoger datos cualitativos	Open Access	2022	Education and Information Technologies	https://doi.org/10.1007/s10639-021-10860-1	Arslantas, T. K., & Gul, A. (2022). Digital literacy skills of university students with visual impairment: A mixed-methods analysis. Education and Information Technologies, 27(4), 5605-5625.	Both for new higher education students and especially for individuals with visual impairment (VI), becoming digitally literate is a necessity in order to be able to fully participate in society and to overcome certain educational barriers. This study explores the digital literacy (DL) skills of university students in Turkey with VI, along with the factors that can affect DL levels. A sequential e…	Digital literacy , Visually impaired , Higher education , Mixed-methods	English	Open Access	2022	Turkey	Aksaray University	Digital Literacy Scale: technical, attitude, cognitive, social	Digital literacy , Visually impaired , Higher education , Mixed-methods	Arslantas, Tugba Kamali;Gul, Abdulmenaf	2022	Open Access	Turkey	Aksaray University and Hakkari University	University students	Digital Literacy Scale (DLS) developed by Ng (2012) and adapted to the Turkish context by Hamutoğlu et al. (2017)	1. Technical 2. Cognitive 3. Social 4. Attitude	17 items	Adaptation	Cronbach's Alpha (0.93)	NM	NM	Yes	NM	NM	NM	1. Technical 2. Cognitive 3. Social 4. Attitude	Unrelated	Critical thinking	Collaboration	Communication
5	Bernate, Jayson;Fonseca, Ingrid;Guataquira, Alexander;Perilla, Alieth	Competencias Digitales en estudiantes de Licenciatura en Educación Física (Digital Competences in Bachelor of Physical Education students)	SI	Sí, el documento incluye las preguntas específicas de investigación y el instrumento completo del estudio. El cuestionario utilizado fue el de la Competencia Digital de Alumnado de Educación Superior (CDAES) diseñado por Gutierrez Cabero y Estrada (2017), compuesto por 44 ítems y 6 variables.	Open Access	2021	Retos	NA	Bernate, J., Fonseca, I., Guataquira, A., & Perilla, A. (2021). Competencias Digitales en estudiantes de Licenciatura en Educación Física. Retos: nuevas tendencias en educación física, deporte y recreación, (41), 309-318.	The objective of this article is to analyze the digital competences in students of Bachelor of Physical Education. For this, the questionnaire of the Digital Competence of Higher Education Students (CDAES) designed by Gutierrez, Cabero and Estrada (2017), composed of 44 items and 6 variables, was applied. The methodology used is quantitative, not experimental, and descriptive in scope. SPSS softw…	Competencias Digitales , Estudiantes Universitarios , Educación Superior , TIC , Digital Competences , University students , Higher education , Competências digitais , Estudantes universitários , Ensino superior , TIC.	English , Spanish	Open Access	2021	Colombia	Corporacion Universitaria Minuto de Dios	digital competences: información, comunicación, creación de contenidos, se_x0002_guridad, y resolución de problema	Competencias Digitales , Estudiantes Universitarios , Educación Superior , TIC , Digital Competences , University students , Higher education , Competências digitais , Estudantes universitários , Ensino superior , TIC.	Bernate, Jayson;Fonseca, Ingrid;Guataquira, Alexander;Perilla, Alieth	2021	Open Access	Colombia	Corporación Universitaria Minuto de Dios	University students	Digital Competence of Higher Education Students (CDAES) questionnaire, designed by Gutierrez, Cabero, and Estrada (2017).	1. Technological Literacy 2. Information Search and Processing 3. Critical Thinking, Problem Solving, and Decision Making 4. Communication and Collaboration 5. Digital Competence 6. Creativity and Innovation	44 items	Validation	Cronbach's Alpha (0.765-0.887)	NM	NM	NM	NM	NM	NM	1. Technological Literacy 2. Information Search and Processing 3. Critical Thinking, Problem Solving, and Decision Making 4. Communication and Collaboration 5. Digital Competence 6. Creativity and Innovation	Creativity	Critical thinking	Collaboration	Communication
6	Betancur-Chicue V.; Gómez-Ardila S.E.; Cárdenas-Rodríguez Y.P.; Hernández-Gómez S.A.; Galindo-Cuesta J.A.; Cadrazco-Suárez M.A.	Instrument for the identification of teachers' digital competence Validation of an instrument based on DigCompEdu at Universidad de La Salle, Colombia.	SI	El estudio describe el desarrollo y validación de un instrumento basado en el marco DIGCOMPEDU, dirigido a evaluar la competencia digital de los docentes en tres áreas específicas: contenidos digitales, enseñanza y aprendizaje, y evaluación y retroalimentación. El proceso incluyó la adaptación de ítems y la incorporación de elementos para identificar las mediaciones tecnológicas en cada área​	Open Access	2023	Prima Social: revista de investigación social	NA	Betancur-Chicué, V., Goméz-Ardila, S. E., Cárdenas-Rodríguez, Y., Hernández-Gómez, S. A., Galindo-Cuesta, J. A., & Cadrazco-Suárez, M. A. (2023). Instrumento para la identificación de competencias digitales docentes: Validación de un instrumento basado en el DigCompEdu en la Universidad de la Salle, Colombia. Prisma Social: revista de investigación social, (41), 27-46.	There are multiple instruments for the diagnosis of digital competence in teaching (DTC), which require adaptations to suit the needs of each context in which the measurement is intended to be carried out. The study presents the validation of an instrument constructed at the University of La Salle, Colombia, to assess digital competence in teaching from the three areas of DigCompEdu linked to the…	DigCompEdu; ICT mediations; Sslf-perception instrument; Teaching digital competence	Spanish	Open Access	2023	Colombia	Universidad de la Salle	Áreas pedagógicas DigCompEdu: Contenidos digitales, Enseñanza y aprendizaje, Evaluación y RetrOpen Accesslimentación	DigCompEdu; ICT mediations; Sslf-perception instrument; Teaching digital competence	Betancur-Chicue V.; Gómez-Ardila S.E.; Cárdenas-Rodríguez Y.P.; Hernández-Gómez S.A.; Galindo-Cuesta J.A.; Cadrazco-Suárez M.A.	2023	Open Access	Colombia	Universidad de la Salle	Professors	New instrument adapted from DigCompEdu framework for assessing teachers' digital competence	1. Digital Content 2. Teaching and Learning Assessment 3. Feedback	11 items	Adaptation and validation	Cronbach's Alpha (0.833) & McDonald's Omega (0.891)	NM	NM	Yes	CFA	NM	NM	1. Digital Content 2. Teaching and Learning Assessment 3. Feedback	Unrelated	Critical thinking	Unrelated	Unrelated
7	Cabero-Almenara J.; Barroso-Osuna J.; Gutiérrez-Castillo J.J.; Palacios-Rodríguez A.	Validation of the Digital Competence Questionnaire for Pre-service Teachers through structural equations modeling	SI	El documento detalla el instrumento de estudio, el cual es un cuestionario diseñado ad hoc para evaluar la autopercepción de competencia digital de los estudiantes de Magisterio, cubriendo distintas dimensiones: alfabetización tecnológica; comunicación y colaboración; búsqueda y tratamiento de la información; ciudadanía digital; creatividad e innovación​	Open Access	2020	Revista de Pedagogía	10.13042/Bordon.2020.73436	Cabero-Almenara, J., Barroso-Osuna, J., Gutiérrez-Castillo, J. J., & Palacios-Rodríguez, A. (2020). Validation of the digital competence questionnaire for pre-service teachers through structural equations modeling. Bordon. Revista de Pedagogía, 72(2), 45-63.	INTRODUCTION. Technology —as a key element for the advancement of 21st century society— has assumed a fundamental role in the educational environment. In this line, different institutions support the importance of digital competence to live, work and learn in the knowledge society. This paper analyzes the reliability and validity of the Digital Competence Questionnaire for Preservice Teachers. Th…	Digital competence; Pre-service teachers; Questionnaires; Structural equation models; Validation	Spanish	Open Access	2020	Spain	University of Seville	Dimensiones asociadas a los estándares ISTE: Creatividad e innovación, communicación y colaboraciónl investigación y manejo de información, pensamiento crítico, solución de problemas y toma de decisiones, ciudadanía digital, funcionamiento y conceptos de las TIC	Digital competence; Pre-service teachers; Questionnaires; Structural equation models; Validation	Cabero-Almenara J.; Barroso-Osuna J.; Gutiérrez-Castillo J.J.; Palacios-Rodríguez A.	2020	Open Access	Spain	University of Seville	University students	DigCompEdu Check-In	1. Technological Literacy 2. Communication and Collaboration 3. Search and Information Processing 4. Digital Citizenship 5. Creativity and Innovation	20 items	Validation	Cronbach's Alpha (0.931)	NM	NM	NM	CFA	NM	NM	1. Technological Literacy 2. Communication and Collaboration 3. Search and Information Processing 4. Digital Citizenship 5. Creativity and Innovation	Unrelated	Critical thinking	Collaboration	Communication
8	Cabero-Almenara J.; Barroso-Osuna J.; Llorente-Cejudo C.; Palacios-Rodríguez A.	Validation of the European Digital Competence Framework for Educators (DigCompEdu) through Structural Equations Modeling	SI	Sí, el documento describe el proceso de validación del modelo DigCompEdu mediante el uso de un cuestionario completado por 2262 docentes de 9 universidades públicas andaluzas, enfocándose en distintas áreas de competencia digital docente. El estudio se basó en el modelado de ecuaciones estructurales con enfoque PLS (mínimos cuadrados parciales)​	Limited	2022	Revista Mexicana de Investigación Educativa	NA	Cabero-Almenara, J., Barroso-Osuna, J., Llorente-Cejudo, C., & Palacios-Rodríguez, A. (2022). Validación del marco europeo de competencia digital docente mediante ecuaciones estructurales. Revista mexicana de investigación educativa, 27(92), 185-208.	The objective of this article is to study the viability of the European Union's DigCompEdu model, which suggests that teachers' digital competence depends on professional commitment, pedagogical competencies, and the ability to develop students' digital competence. The method of analysis was based on the modeling of structural equations with a PLS (partial least squares) apprOpen Accessch. A ques…	Analytical model; Digital competencies; Quantitative methodology; Teacher training	Spanish	Limited	2022	Spain	University of Seville	Competencia Digital Docente: Competencias profesionales, Competencias pedagógicas, Competencias de los estudiantes	Analytical model; Digital competencies; Quantitative methodology; Teacher training	Cabero-Almenara J.; Barroso-Osuna J.; Llorente-Cejudo C.; Palacios-Rodríguez A.	2022	Limited	Spain	All the public universities in Andalusia	Professors	DigCompEdu Check-In	1. Professional Engagement 2. Digital Resources 3. Teaching and Learning 4. Assessment 5. Empowering Learners 6. Facilitating Students' Digital Competence	22 items	Adaptation and validation	Cronbach's Alpha (1)	NM	NM	NM	CFA	NM	NM	1. Professional Engagement 2. Digital Resources 3. Teaching and Learning 4. Assessment 5. Empowering Learners 6. Facilitating Students' Digital Competence	Unrelated	Unrelated	Collaboration	Communication
9	Cabero-Almenara, J., & Palacios-Rodríguez, A.	Digital Competence Framework for Educators «DigCompEdu». Translation and adaptation of «DigCompEdu Check-In» questionnaire	SI	Sí, el documento incluye el instrumento completo del estudio, específicamente la traducción y adaptación al español del cuestionario «DigCompEdu Check-In», que busca evaluar la competencia digital de los docentes​	Open Access	2019	EDMETIC, Revista de Educación Mediática y TIC	https://doi.org/10.21071/edmetic.v9i1.1246	Cabero-Almenara, J., & Palacios-Rodríguez, A. (2020). Marco Europeo de Competencia Digital Docente «DigCompEdu» y cuestionario «DigCompEdu Check-In». EDMETIC, Revista de Educación Mediática y TIC, 9(1), 213-234. doi: https://doi.org/10.21071/edmetic.v9i1.1246	Technology, as a fundamental ingredient for the advancement of the Knowledge Society, has assumed a fundamental role in the educational environment. At the same time, different institutions and scientific studies support the importance of digital teaching competence in new literacy contexts. This article, provide an objective and rigorous analysis of the concept, studying the Digital Competence F…	Digital competence, Digital literacy, Teacher training, Questionnaire.	English	Open Access	2019	Spain					2019	Open Access	all EU countries​	University of Sevilla	Professors	DigCompEdu Check-In	1. Professional Engagement 2. Digital Resources 3. Teaching and Learning 4. Assessment 5. Empowering Learners 6. Facilitating Students' Digital Competence	22 items	Adaptation	NM	NM	NM	NM	NM	NM	NM	1. Professional Engagement 2. Digital Resources 1. Teaching and Learning 2. Assessment 3. Empowering Learners 1. Facilitating Learners' Digital Competence	Unrelated	Critical thinking	Unrelated	Communication
10	Cabero-Almenara, Julio; Gutiérrez-Castillo, Juan-Jesús; Palacios-Rodríguez, Antonio; Barroso-Osuna, Julio	Development of the Teacher Digital Competence Validation of DigCompEdu Check-In Questionnaire in the University Context of Andalusia (Spain)	SI	Sí, el documento incluye el instrumento completo del estudio, el cuestionario DigCompEdu Check-In, compuesto por 22 ítems que se refieren a las 6 competencias analizadas en "DigCompEdu". Este instrumento se utilizó para evaluar la competencia digital de los profesores en seis áreas de competencia distintas	Open Access	2020	Sustainability	https://doi.org/10.3390/su12156094	Cabero-Almenara, J., Gutiérrez-Castillo, J. J., Palacios-Rodríguez, A., & Barroso-Osuna, J. (2020). Development of the teacher digital competence validation of DigCompEdu check-in questionnaire in the university context of Andalusia (Spain). Sustainability, 12(15), 6094.	We are currently witnessing a moment in history in which sustainable education practices are being principally modified by the proliferation of technologies and their wider use in every level of society, which makes necessary their integration into education contexts. This is found in the crosshairs of different institutions, which propose a series of competency frameworks, such as DigCompEdu. Th…	digital competence , questionnaires , validation , pre-service professors , DigCompEdu	English	Open Access	2020	Spain	University of Seville	Digital competences od educators: general, professional engagement, digital resources, teaching and learning, assessment, empowering learners, facilitating learner's digital competences	digital competence , questionnaires , validation , pre-service professors , DigCompEdu	Cabero-Almenara, Julio;Gutiérrez-Castillo, Juan-Jesús;Palacios-Rodríguez, Antonio;Barroso-Osuna, Julio	2020	Open Access	Spain	Public universities in Andalusia	Professors	DigCompEdu Check-In	1. Professional Engagement 2. Digital Resources 3. Teaching and Learning 4. Assessment 5. Empowering Learners 6. Facilitating Students' Digital Competence	22 items	Validation	McDonald's Omega (0.967)	NM	NM	NM	CFA	NM	NM	2. Professional Engagement 3. Digital Resources 4. Teaching and Learning 5. Assessment 6. Empowering Learners 7. Facilitating Learners’ Digital Competence	Unrelated	Critical thinking	Unrelated	Communication
11	Casildo-Bedon, NE; Sanchez-Torpoco, DL; Carranza-Esteban, RF; Mamani-Benito, O; Turpo-Chaparro, J	Psychometric properties of the digital competencies questionnaire in Peruvian university students	SI	El documento describe de manera detallada el instrumento utilizado para el estudio, conocido como el Cuestionario CompdigEU 1.0. Este cuestionario fue adaptado de uno diseñado previamente por Orosco et al. (2020) y basado en el Marco Europeo de Competencia Digital para el Ciudadano v2.1 digComp. Evalúa 21 competencias dentro de cinco áreas competenciales (Información y alfabetización informaciona…	Open Access	2023	Campus Virtuales	NA	Casildo-Bedón, N. E., Sánchez-Torpoco, D. L., Carranza-Esteban, R. F., Mamani-Benito, O., & Turpo-Chaparro, J. (2023). Propiedades psicométricas del cuestionario de competencias digitales en estudiantes universitarios peruanos. Campus Virtuales, 12(1), 93-102.	With the rise of digital transformation, traditional education has undergone significant changes; in higher education it is necessary to develop basic digital competencies to ensure academic continuity. The research aims to analyze the psychometric properties of a digital competencies questionnaire in Peruvian university students. A quantitative study of instrumental design was carried out with t…	Digital competencies; Digital literacy; DigComp 2; 1; University students; Factor analysis	English	Open Access	2023	Peru	Universidad Peruana Unión	Competencias digitales de CompDigEu 1.0: información y alfabetización informacional, comunicación y colaboración, creación de contenidos digitales, seguridad y resolución de problemas	Digital competencies; Digital literacy; DigComp 2; 1; University students; Factor analysis	Casildo-Bedon, NE; Sanchez-Torpoco, DL; Carranza-Esteban, RF; Mamani-Benito, O; Turpo-Chaparro, J	2023	Open Access	Peru	Universidad Peruana Unión, Universidad San Ignacio de Loyola, and Universidad Señor de Sipán	University students	Digital Competencies Questionnaire adapted from the questionnaire designed by Orosco et al. (2020)	1. Information and literacy informational 2. Communication and collaboration 3. Creation of digital content 4. Security 5. Problem-solving	42 items	Adaptation and validation	Cronbach's Alpha (0.85-0.91)	NM	NM	Yes	CFA	NM	NM	1. Information and literacy informational 2. Communication and collaboration 3. Creation of digital content 4. Security 5. Problem-solving	Creativity	Unrelated	Collaboration	Communication
12	Cerda González, C., León Herrera, M., Saiz Vidallet, J. L., & Villegas Medrano, L.	Chilean student teachers' purposes of use of digital technologies: Construction of a scale based on digital competences	SI	Sí, el documento detalla tanto las preguntas de investigación como el instrumento completo del estudio. El objetivo fue construir y analizar psicométricamente la Escala de Propósitos de Uso y Competencias Digitales (EPUCD), destinada a evaluar el uso de tecnologías digitales entre estudiantes de pedagogía chilenos basándose en competencias digitales. Se presentan tanto los procedimientos de valid…	Open Access	2022	PIXEL-BIT Revista de medios y educación	https://doi.org/10.12795/pixelbit.93212	Cerda Gonzalez, C., Leon Herrera, M., Saiz Vidallet, J. L., & Villegas Medrano, L. (2022). Chilean student teachers' purposes of use of digital technologies: Construction of a scale based on digital competences.	The acquisition of digital competences enables people's active development in different areas of society. In the case of many young people, and especially among future teachers, this acquisition is obtained through the daily use of digital technologies. Having instruments to measure digital competences associated to different purposes of use can contribute to provide feedback on the acquisition o…	Digital competence; educational technology; teacher education; higher education; measurement	Spanish	Open Access	2022	Spain	Universidad de Sevilla	Capacidades digitales: Capacidades para usar las TIC, Capacidades para encontrar, procesar y evaluar información, Capacidades de comunicación, Capacidades de comunicación, Capacidades para generar contenidos	Digital capabilities, digital divide, information literacy, media literacy, university students, university teachers.	González-Quiñones, Fidel;Tarango, Javier;Villanueva-Ledezma, Armando	2022	Open Access	Spain	Spanish universities	Professors	Scale of Purposes of Use and Digital Competences (EPUCD, Escala de Propósitos de Uso y Competencias Digitales in Spanish)	1. Browsing, searching and filtering data, information and digital content 2. Managing data, information and digital content 3. Interacting through digital technologies 4. Sharing through digital 5. Technologies 6. Developing digital content.	74 items	Design and validation	Cronbach's Alpha (0.80)	NM	NM	Yes	CFA & EFA	NM	NM	1. Browsing, searching and filtering data, information and digital content 2. Managing data, information and digital content 3. Interacting through digital technologies 4. Sharing through digital 5. Technologies 6. Developing digital content.	Unrelated	Critical thinking	Collaboration	Communication
13	Chávez-Melo, G., Cano-Robles, A., & Navarro-Rangel, Y.	Initial validation of an instrument to measure teacher digital competence	SI	El documento detalla el proceso de validación inicial de un instrumento destinado a medir la competencia digital de los docentes. Este instrumento, basado en el marco del INTEF (2017) y adaptado del propuesto por Tourón et al. (2018), consta de 54 ítems agrupados en cinco dimensiones teóricas y fue aplicado a 978 docentes en México. El estudio analiza la fiabilidad y la validez del instrumento me…	Open Access	2022	Campus Virtuales	NA	Melo, G. C., Robles, A. C., & Rangel, Y. N. (2022). Validación inicial de un instrumento para medir la competencia digital docente. Campus Virtuales, 11(2), 97-106.	This study aims to analyze a construct to determine the level of auto perception of teaching digital competence (TDC) based on the INTEF (2017) common framework. This instrument was designed and validated in Spain; it consists of 54 items grouped into five theoretical dimensions. This study is applied to 978 teachers in Mexico. The reliability index is .985, estimated with Cronbach's Alpha. The v…	Digital competence; Teacher training; Postgraduate; Technological mediation; Educational technology	Spanish	Open Access	2022	Mexico	Benemérita Universidad Autónoma de Puebla	Teaching digital competencies: Información y alfabetización informacional, Comunicación y colaboración, creación de contenidos digitales, seguridad informática, resolución de problemas	Digital competence; Teacher training; Postgraduate; Technological mediation; Educational technology	Chavez-Melo, G; Cano-Robles, A; Navarro-Rangel, Y	2022	Open Access	Mexico	Benemérita Universidad Autónoma de Puebla	Professors	New instrument based on the INTEF (2017) framework	1. Incorporation of resources for safety and computer maintenance (RSMI) 2. Development of basic digital literacy competencies and information management (AdgI) 3. Creation of digital content (CCd) 4. Digital resources in the context of digital citizenship (Cd) 5. Strategies and tools for communication and collaboration (EhCC)	54 items	Design and validation	Cronbach's Alpha (0.985)	NM	NM	NM	EFA	NM	NM	1. Incorporation of resources for safety and computer maintenance (RSMI) 2. Development of basic digital literacy competencies and information management (AdgI) 3. Creation of digital content (CCd) 4. Digital resources in the context of digital citizenship (Cd) 5. Strategies and tools for communication and collaboration (EhCC)	Creativity	Unrelated	Collaboration	Communication
14	Contreras-Espinoza, K. L., González-Martínez, J., & Gallardo-Echenique, E.	Psychometric validation of an instrument to assess digital competencies	SI	Sí, el documento proporciona una descripción detallada del instrumento de evaluación utilizado, el Cuestionario de Autopercepción de la Competencia Digital Docente (CACDD), adaptado y validado para su uso en docentes peruanos	Open Access	2022	Revista Ibérica de Sistemas e Tecnologias de Informação	NA	Contreras-Espinoza, K. L., González-Martínez, J., & Gallardo-Echenique, E. (2022). Validación psicométrica de un instrumento para evaluar la competencia digital. Revista Ibérica de Sistemas e Tecnologias de Informação, (E50), 296-309.	The aim of this research is to analyze the psychometric properties of the self-perception questionnaire of the digital competence of the university professors (in Spanish, CACDD). Digital competence of university professors consists in using digital technologies in a pedagogic-didactic context being awareness of its implications for learning. The sample consisted of 302 Peruvian teachers from a p…	digital competence; digital technology; Higher education; quantitative research; validity of the scales	Spanish	Open Access	2022	Peru	Sistema Nacional de Evaluación, Acreditación y Certificación de la Calidad Educativa (SINEACE)	Cuestionario de Autopercepción de la Competencia Digital Docente (CACDD): (a) facilitar e inspirar el aprendizaje y la creatividad; (b) diseñar y desarrollar experiencias y evaluaciones del aprendizaje era digital; (c) modelar el trabajo y aprendizaje en la era digital; (d) promover y modelar la responsabilidad y ciudadanía digital; y (e) participar en el desarrollo profesional y el liderazgo.	digital competence; digital technology; Higher education; quantitative research; validity of the scales	Contreras-Espinoza K.L.; González-Martínez J.; Gallardo-Echenique E.	2022	Open Access	Peru	Sistema Nacional de Evaluación, Acreditación y Certificación de la Calidad Educativa (SINEACE)	Professors	Self-Perception Questionnaire of Digital Competence for Teachers (CACDD) developed by Esteve (2015).	1. Facilitate and inspire learning and creativity; 2. Design and develop digital era learning experiences and assessments; 3. Model work and learning in the digital era; 4. Promote and model digital responsibility and citizenship; 5. Participate in professional development and leadership.	40 items	Adaptation and validation	Cronbach's Alpha (0.979)	NM	NM	NM	EFA	NM	NM	1. Facilitate and inspire learning and creativity; 2. Design and develop digital era learning experiences and assessments; 3. Model work and learning in the digital era; 4. Promote and model digital responsibility and citizenship; 5. Participate in professional development and leadership.	Creativity	Unrelated	Collaboration	Communication
15	Durán Cuartero, M., Gutiérrez Porlán, I., & Prendes Espinosa, M. P.	Certification of ICT competence in university teaching staff: Design and validation of an instrument.	SI	Sí, el documento detalla tanto las preguntas de investigación como el instrumento completo de estudio. El principal objetivo fue diseñar y validar un instrumento de evaluación para certificar la competencia en Tecnologías de la Información y la Comunicación (TIC) del profesorado universitario.	Open Access	2016	Revista mexicana de investigación educativa	NA	Durán Cuartero, M., Gutiérrez Porlán, I., & Prendes Espinosa, M. P. (2016). Certificación de la competencia TIC del profesorado universitario: Diseño y validación de un instrumento. Revista mexicana de investigación educativa, 21(69), 527-556.	This article presents the results of research focused on designing and validating an evaluation instrument to certify university professors' competency in Information and Communications Technologies (ICT). Based on a discussion group and a pilot test, we designed an instrument that was validated by experts. The methodology for its elaboration revolved around a continuous cycle of design, validati…		Spanish	Open Access	2016	Spain	Universidad de Murcia	professors’ competency in Information and Communications Technologies (ict)		Cuartero, Marta Durán;Porlán, Isabel Gutiérrez;Espinosa, María Paz Prendes	2016	Open Access	Spain	Universidad de Murcia	Professors	New instrument designed to certify university teachers' competency in ICT.	1. Bases of Knowledge that support action with ICT. 2. Design, Implementation, and Evaluation of action with ICT. 3. Individual and/or Collective Critical Reflection on action with ICT.	14 items	Design	NM	NM	NM	Yes	NM	NM	NM	1. Bases of Knowledge that support action with ICT. 2. Design, Implementation, and Evaluation of action with ICT. 3. Individual and/or Collective Critical Reflection on action with ICT.	Creativity	Critical thinking	Collaboration	Communication
16	Gallardo Echenique, E., Tomás-Rojas, A., Bossio, J., & Freundt-Thurne, U.	Evidencias de validez y confiabilidad del DigCompEdu CheckIn en docentes de una universidad privada peruana	SI	El documento describe un estudio que valida la herramienta DigCompEdu CheckIn entre docentes de una universidad privada peruana, basándose en su autopercepción sobre competencias digitales. Aunque se menciona la utilización del instrumento DigCompEdu CheckIn, compuesto por 22 ítems, no se presenta el cuestionario completo ni las preguntas específicas utilizadas en el estudio dentro de los fragmen…	Open Access	2023	Publicaciones	https://doi.org/10.30827/publicaciones.v53i2.26817	Gallardo-Echenique, E., Tomas-Rojas, A., Bossio, J., & Freundt-Thurne, U. (2023). Evidence of validity and reliability of DigCompEdu CheckIn among professors at a Peruvian private university. Revista Publicaciones, 69-88.	Introduction: For some years now, various frameworks and self-assessment tools have been developed to describe the facets of teachers & rsquo; digital competence, one of these being the DigCompEdu CheckIn. This has been validated in English in Morocco, in German in Ger-many, and in Spanish in Spain. The objective of this study is to validate the instrument that was developed in another context, s…	digital competence; higher education; COVID-19; validity; reliability	English	Open Access	2023	Peru		Digital competence: DigCompEdu	digital competence; higher education; COVID-19; validity; reliability	Gallardo-Echenique, E; Tomas-Rojas, A; Bossio, J; Freundt-Thurne, U	2023	Open Access	Peru	Private university in Peru	Professors	DigCompEdu Check-In	1. Educators' Professional Competencies 2. Educators' Pedagogical Competencies 3. Student Competencies	22 items	Adaptation and validation	McDonald's Omega (0.89-0.86)	NM	NM	NM	CFA & EFA	NM	NM	1. Educators' Professional Competencies 2. Educators' Pedagogical Competencies 3. Student Competencies	Unrelated	Critical thinking	Unrelated	Unrelated
17	González Calatayud, Víctor ; Prendes-Espinosa, María Paz; Solano-Fernández, Isabel María	Instrument for analysing digital entrepreneurship competence in higher education	SI	Sí, el documento detalla la creación y validación de un cuestionario cuantitativo diseñado para evaluar la competencia de emprendimiento digital en estudiantes universitarios. Se describe el proceso de validación que incluyó un panel de expertos, entrevistas cognitivas y análisis factorial exploratorio. El cuestionario final, que mide cuatro áreas y 15 subcompetencias, se presenta en el artículo,…	Open Access	2022	RELIEVE. Revista Electrónica de Investigación y Evaluación Educativa	NA	González-Calatayud, V., Prendes-Espinosa, M. P., & Solano-Fernández, I. M. (2022). Instrument for analysing digital entrepreneurship competence in higher education. Electronic Journal of Educational Research, Assessment & Evaluation, 28(1).	Entrepreneurship and digital skills are key competences that students must acquire throughout their formal education. The EmDigital model was developed to assess digital entrepreneurship competence by combining both. This model describes the competence of digital entrepreneurship in terms of four areas and 15 subcompetences. The aim of the study is to validate a quantitative instrument to measure…	Digital entrepreneurship , competence , Higher Education , questionnaire , Emprendimiento digital , competencia , educación superior , cuestionario , Empreendedorismo digital , competência , ensino superior , questionário , 数字创业 , 能力 , 高等教育问卷	English	Open Access	2022	Chile	Universidad de la Frontera, Universidad Católica de Temuco	A = Navegar, buscar datos, información y contenido digital; B = Gestionar datos, información y contenido digital; C = Interactuar a través de tecnologías digitales; D = Compartir a través de tecnologías digitales; y E = Desarrollar contenido digital en docentes	Digital competence; educational technology; teacher education; higher education; measurement	Gonzalez, CC; Herrera, ML; Vidallet, JLS; Medrano, LV	2022	Open Access	Spain	University of Murcia	University students and professors	New instrument based on EmDigital model.	1. Identifying Opportunities 2. Action Planning 3. Initiative and Collaboration 4. Management and Security	50 items	Design and validation	Cronbach's Alpha (0.956) & McDonald's Omega (0.967)	NM	NM	Yes	EFA	NM	NM	1. Identifying Opportunities 2. Action Planning 3. Initiative and Collaboration 4. Management and Security	Unrelated	Critical thinking	Collaboration	Communication
18	González-Quiñones, F., Tarango, J., & Villanueva-Ledezma, A.	Hacia una propuesta para medir capacidades digitales en usuarios de internet	SI	Sí, el documento detalla un instrumento específico para medir las capacidades digitales, enfocado en docentes y estudiantes universitarios. Este instrumento incluye un diagnóstico comprensivo de capacidades digitales, integrado por distintas secciones que abarcan desde datos sociodemográficos hasta capacidades específicas en el uso de las TIC, la búsqueda y evaluación de información, comunicación…	NO	2019	Revista Interamericana de Bibliotecología	https://doi.org/10.17533/udea.rib.v42n3a01	González-Quiñones, F., Tarango, J., & Villanueva-Ledezma, A. (2019). Hacia una propuesta para medir capacidades digitales en usuarios de internet. Revista Interamericana de Bibliotecología, 42(3), 197-212.	Este artículo presenta un instrumento concreto para medir las capacidades digitales de docentes y estudiantes universitarios, a través del cual se pretende conocer la realidad actual de los sujetos participantes en una comunidad determinada sobre sus capacidades y habilidades en la utilización de herramientas digitales, la comprensión en encontrar información de calidad y la capacidad de generar …	capacidades digitales , brecha digital , alfabetización informacional , alfabetización mediática , estudiantes universitarios , docentes universitarios	Spanish , English , Portuguese	Limited	2019	Spain	Universitat Oberta Catalunya	Competence Assessment Model (CAM): Authenticity, cognitive complexity, fairness, meaningfulness, transparecy, educational consequences, rerpoducibility of decisions, comparability, cost and efficiency	competence-based assessment; digital competence; primary education; quality criteria; secondary education	Guàrdia L.; Maina M.; Mancini F.; Martinez Melo M.	2019	Limited	Mexico	Universidad Autónoma de Chihuahua	University students	New instrument developed to measure digital capabilities in internet users.	1. Using ICT effectively. 2. Finding, processing, evaluating, and using information effectively. 3. Communication. 1. Generation of digital content.	14 items	Design and validation	NM	NM	NM	Yes	NM	NM	Yes	1. Using ICT effectively. 2. Finding, processing, evaluating, and using information effectively. 3. Communication. 1. Generation of digital content.	Unrelated	Critical thinking	Unrelated	Communication
19	Guillén-Gámez F.D.; Mayorga-Fernández M.J.	Design and validation of an instrument of self-perception regarding the lecturers’ use of ICT resources: to teach, evaluate and research	SI	Sí, el documento incluye el instrumento completo del estudio. Se describe el desarrollo y la validación de un cuestionario para evaluar el uso de recursos TIC por parte de docentes universitarios en España, basado en el modelo UICT-TER, con un enfoque en tres dimensiones y un total de 24 ítems iniciales, refinados a 16 ítems en la versión final.	Limited	2021	Education and Information Technologies	https://doi.org/10.1007/s10639-020-10321-1	Guillén-Gámez, F. D., & Mayorga-Fernández, M. J. (2021). Design and validation of an instrument of self-perception regarding the lecturers’ use of ICT resources: to teach, evaluate and research. Education and Information Technologies, 26, 1627-1646.	This study is part of a research about the use of ICT resources by Higher Education teachers to teach, evaluate and research (UICT-TER). The aim, in this case, is the creation and validation of a measuring instrument on the use of ICT resources based on the UICT-TER model. After the preparation and application of the instrument to a sample of 867 Higher Education teachers in the Spanish territory…	Digital competence; Higher education; Information and communication technologies (ICT); Lecturers; Questionnaire	English	Open Access	2021	Spain	Universidad de Córdoba	Dimensions: Tutor’s functions with students, Tutor’s functions with the teaching staff, Tutor’s functions with students’ families, ITC training and transfer, Use of ICT resources	digital competence; tutorial action; teachers; psychometrics; reliability; validity; factorial invariance; research methods	Guillen-Gamez, FD; Mayorga-Fernandez, MJ; Contreras-Rosado, JA	2021	Open Access	Spain	Universidad de Córdoba	Professors	UTIC-EEI instrument	1. Use of ICT resources to teach. 2. Use of ICT resources to evaluate students. 3. Use of ICT resources to research and publish scientific articles.	24 items	Design and validation	Cronbach's Alpha (0.89)	NM	NM	Yes	CFA & EFA	NM	NM	1. Use of ICT resources to teach. 2. Use of ICT resources to evaluate students. 3. Use of ICT resources to research and publish scientific articles.	Unrelated	Critical thinking	Unrelated	Communication
20	Gutiérrez-Castillo, J.-J., Cabero-Almenara, J., & Estrada-Vidal, L. I.	Design and validation of an instrument for evaluation of digital competence of University student	SI	Sí, el documento detalla tanto las preguntas específicas de investigación como el instrumento completo del estudio. Describe la construcción y las características psicométricas del Cuestionario para el Estudio de la Competencia Digital del Alumnado de Educación Superior (CDAES) diseñado para evaluar la autopercepción de competencia digital de los estudiantes universitarios. El cuestionario presen…	Open Access	2017	Revista Espacios	NA	Gutiérrez-Castillo, J. J., Cabero-Almenara, J., & Estrada-Vidal, L. (2017). Design and validation of an instrument for evaluation of digital competence of University student. Espacios, 38(10), 16.	Under the aim describes the construction and the psychometric characteristics of the questionnaire for the study of the Digital Competence of Students in Higher Education (CDAES) as ad hoc instrument to collect evaluate the degree of self-perception of digital competence that show college students education (Degrees of Kindergarten education and Primary) of the various Faculties and Schools of th…	Digital literacy; Higher education; ICT; Measurement scale; Teacher training; Teaching competences	Spanish	Open Access	2017	Spain, Cuba	University of Granada, University of Informatics Sciences	digital communicative competence	construct validity and reliability; constructing digital communicative competence; higher education; questionnaire development; questionnaire validation	Gutiérrez-Santiuste E.; García-Lira K.; Montes R.	2017	Open Access	Spain	All Andalusian universities	University students	New instrument to assess Digital Competence of Higher Education Students (CDAES).	1. Technological Literacy (Functioning and concepts of ICTs) 2. Information Search and Processing (Research and management of information) 3. Critical Thinking, Problem Solving, and Decision Making 4. Communication and Collaboration 5. Digital Citizenship 6. Creativity and Innovation	44 items	Design and validation	Cronbach's Alpha (0.966)	NM	NM	Yes	EFA	NM	NM	1. Technological Literacy (Functioning and concepts of ICTs) 2. Information Search and Processing (Research and management of information) 3. Critical Thinking, Problem Solving, and Decision Making 4. Communication and Collaboration 5. Digital Citizenship 6. Creativity and Innovation	Unrelated	Critical thinking	Collaboration	Communication
21	Gutiérrez-Santiuste E.; García-Lira K.; Montes R.	Design and Validation of a Questionnaire to Assess Digital Communicative Competence in Higher Education	SI	Sí, el documento detalla tanto las preguntas específicas de investigación como el instrumento completo del estudio. Se desarrolló un cuestionario para evaluar la competencia comunicativa digital en estudiantes de educación superior, basándose en un marco teórico que conceptualiza la competencia comunicativa digital como la intersección entre competencias comunicativas y digitales.	Open Access	2023	International Journal of Instruction	http://dx.doi.org/10.29333/iji.2023.16114a	Gutiérrez-Santiuste, E., García-Lira, K., & Montes, R. (2023). Design and Validation of a Questionnaire to Assess Digital Communicative Competence in Higher Education. International Journal of Instruction, 16(1).	This paper shows the design and validation of a questionnaire aimed at college students to assess digital communicative competence. Starting from the theoretical framework presented, we conceptualized digital communicative competence as the intersection between communicative and digital competences. To that effect, we hereby explain the analysis and validation procedure of the psychometric proper…	construct validity and reliability; constructing digital communicative competence; higher education; questionnaire development; questionnaire validation	English	Open Access	2023	8 African countries: Ivory cOpen Accessst, Equatorial Guinea, Mali, Senegal, Mozambique, Gabon, Angola, Cameroon	Universidad Internacional de Valencia	ICT Competency Framework for Teachers: knowledge acquisition, knowledge deepening, knowledge creation	African continent; digital competence; educational needs; primary education; primary school teachers' perspectives	Harada, AS; Gomes, JA; Guerra, OU; Ruiz, R; Calderon, R	2023	Open Access	Spain and Cuba	University of Granada and the University of Informatics Sciences in Cuba	University students	New instrument developed to assess Digital Communicative Competence in Higher Education.	1. Operation and Search for Information 2. Creation and Editing of Digital Contents 3. Publication of Information 4. Digital Content Consumption Preferences 5. Digital Content Production Preferences 6. Collective Intelligence through Technology	21 items	Design and validation	Cronbach's Alpha (0.966)	NM	NM	Yes	CFA & EFA	Yes	NM	1. Operation and Search for Information 2. Creation and Editing of Digital Contents 3. Publication of Information 4. Digital Content Consumption Preferences 5. Digital Content Production Preferences 6. Collective Intelligence through Technology	Creativity	Critical thinking	Unrelated	Communication
22	Hidayat, ML; Hariyatmi; Astuti, DS; Sumintono, B; Meccawy, M; Khanzada, TJS	Digital competency mapping dataset of pre-service teachers in Indonesia	SI	Sí, el documento detalla el instrumento completo utilizado en el estudio, el Digital Competency Scale (DCS), que consta de 36 ítems distribuidos en cinco constructos o dimensiones: 1) alfabetización en datos e información, 2) comunicación y colaboración, 3) creación de contenido digital, 4) seguridad, y 5) resolución de problemas, utilizando una escala Likert de cinco puntos​	Open Access	2023	Data in Brief	https://doi.org/10.1016/j.dib.2023.109310	Hidayat, M. L., Astuti, D. S., Sumintono, B., Meccawy, M., & Khanzada, T. J. (2023). Digital Competency Mapping Dataset of Pre-service Teachers in Indonesia. Data in Brief, 109310.	This dataset used the Digital Competency Scale (DCS) to de-scribe Indonesian pre-service teachers' perceptions. The DCS instrument consisted of five constructs/dimensions, which are: 1) data and information literacy, 2) communication and collaboration, 3) digital content creation, 4) safety, and 5) problem-solving, with a total of 36 items using five-point agreement Likert scale. The data was gat…	Digital competency; Pre-service teachers; Rasch model; Digital literacy; Teacher training	English	Open Access	2023	Spain	University of Salamanca	communicative competence	communicative competence; validity; reliability; compulsory education	Iglesias-Rodriguez, A; Hernandez-Martin, A; Martin-Gonzalez, Y; Herraez-Corredera, P	2023	Open Access	Indonesia	Muhammadiyah Universities network	University students	Digital Competency Scale (DCS)	1. Data and information literacy 2. Communication and collaboration 3. Digital content creation 4. Safety 5. Problem-solving	36 items	Design and validation	Rasch model (0.92)	NM	NM	Yes	Rasch model	NM	NM	1. Data and information literacy 2. Communication and collaboration 3. Digital content creation 4. Safety 5. Problem-solving	Creativity	Critical thinking	Collaboration	Communication
23	Jorge-Vázquez, Javier; Sergio Luis Náñez Alonso; Washington Raúl Fierro Saltos; Silvia Pacheco Mendoza	Assessment of Digital Competencies of University Faculty and Their Conditioning Factors: Case Study in a Technological Adoption Context	SI	Sí, el documento detalla tanto las preguntas específicas de investigación como el instrumento completo utilizado en el estudio. El estudio se centró en examinar el nivel de competencias digitales de los docentes universitarios y en identificar sus factores condicionantes.	Open Access	2021	Education sciences	https://doi.org/10.3390/educsci11100637	Jorge-Vázquez, J., Náñez Alonso, S. L., Fierro Saltos, W. R., & Pacheco Mendoza, S. (2021). Assessment of digital competencies of university faculty and their conditioning factors: Case study in a technological adoption context. Education Sciences, 11(10), 637.	The rise of digital technologies and their educational applications increasingly require the development of digital skills among university faculty. This study focuses on examining the level of digital competencies of university faculty and identifying their conditioning factors. To achieve this objective, an ex post facto methodological design with surveys is used. A sample of 216 university tea…	digital competences , higher education , technology adoption , digital literacy , teacher training , digital skills	English	Open Access	2021	Thailand	Chulalongkorn University	Information Literacy, Media Literacy, ICT Literacy	Assessment Management System , Information Literacy , Media Literacy , Information Communication and Technology Literacy	Khlaisang, Jintavee;Koraneekij, Prakob	2021	Open Access	Ecuador	Public universities in Ecuador	Professors	New instrument based on the ICT competences framework for teachers proposed by UNESCO (2018).	1. Knowledge Acquisition 2. Knowledge Deepening 3. Knowledge Creation	18 items	Design and validation	NM	NM	NM	Yes	NM	NM	NM	1. Knowledge Acquisition 2. Knowledge Deepening 3. Knowledge Creation	Creativity	Critical thinking	Unrelated	Unrelated
24	Khlaisang, J., & Koraneekij, P.	Open Online Assessment Management System Platform and Instrument to Enhance the Information, Media, and ICT Literacy Skills of 21st Century Learners	SI	Sí, el documento detalla el desarrollo y validación de un Sistema de Gestión de Evaluaciones en Línea (OOAMS) y un instrumento estandarizado para evaluar la alfabetización informativa, mediática y en TIC, con un enfoque específico en los estudiantes de educación superior. El instrumento estandarizado incluye 49 ítems para la alfabetización informativa, 63 ítems para la alfabetización mediática y …	Open Access	2019	International Journal of Emerging Technologies in Learning (Online)	https://doi.org/10.3991/ijet.v14i07.9953	Khlaisang, J., & Koraneekij, P. (2019). Open online assessment management system platform and instrument to enhance the information, media, and ICT literacy skills of 21st century learners. International Journal of Emerging Technologies in Learning (Online), 14(7), 111.	Information literacy (IL), media literacy (ML), and information communication and technology literacy (ICT Literacy: ICTL) are some of the most important skills for 21st century learning and which help promote other skills, including life and career skills and learning and innovation skills. This kind of learning allows students to connect as a learning network without barriers or borders. It ful…	Assessment Management System , Information Literacy , Media Literacy , Information Communication and Technology Literacy	English	Open Access	2019	Istanbul	Yildiz Technical University	Teachers' Basic ICT Competence Beliefs: information data literacy, communication and collaboration (6 items), digital content creation, safety and security, problem-solving, and analyzing and reflecting	Cross-cultural validation; Pedagogical issues; ICT competence beliefs; Teacher professional; development	Korukluoglu, P; Alci, B; Rubach, C	2019	Open Access	Thailand	Chulalongkorn University	University students	Open Online Assessment Management System (OOAMS)	1. Information Literacy 2. Media Literacy 3. ICT Literacy	181 items	Design and validation	NM	NM	NM	Yes	CFA & EFA	NM	NM	1. Information Literacy 2. Media Literacy 3. ICT Literacy	Unrelated	Unrelated	Unrelated	Communication
25	Kotzebue, L. v., Meier, M., Finger, A., Kremser, E., Huwer, J., Thoms, L.-J., Becker, S., Bruckermann, T., & Thyssen, C.	The Framework DiKoLAN (Digital Competencies for Teaching in Science Education) as Basis for the Self-Assessment Tool DiKoLAN-Grid	SI	Sí, el documento describe en detalle el marco DiKoLAN para las competencias digitales en la educación en ciencias, así como el desarrollo y los resultados iniciales del instrumento de autoevaluación basado en el marco, DiKoLAN-Grid, diseñado para evaluar las competencias digitales específicas de los docentes en formación en ciencias​	Open Access	2021	Education sciences	https://doi.org/10.3390/educsci11120775	Kotzebue, L. V., Meier, M., Finger, A., Kremser, E., Huwer, J., Thoms, L. J., ... & Thyssen, C. (2021). The framework DiKoLAN (Digital competencies for teaching in science education) as basis for the self-assessment tool DiKoLAN-Grid. Education Sciences, 11(12), 775.	For the planning and implementation of lessons with digital technologies, a subject-specific technology-related professional competence of teachers is of central importance. However, the competency frameworks developed so far remain in a general perspective and do not explicitly address subject-specific issues. Furthermore, digital competencies are predominantly measured with subject-unspecific s…	Technological Pedagogical Content Knowledge , science education , student teachers , self-report measure	English	Open Access	2021	Spain	University of Seville	DigcompEdu: professional commitment, digital resources, digital pedagogy, evaluation and feedback, student empowerment, facilitating student digital competence	Digital competence; ICT; Social inclusion; Structural equation method; University teaching	Llorente-Cejudo C.; Barragán-Sánchez R.; Puig-Gutiérrez M.; Romero-Tena R.	2021	Open Access	Austria, Germany, and Switzerland	University of Salzburg, University of Kassel and Leipzig University , Technical University of Darmstadt, University of Konstanz, University of Education Thurgau (Switzerland), LMU München, University of Cologne, Leibniz University Hannover, and University of Kaiserslautern (Germany)	Professors	DiKoLAN-Grid based on the DiKoLAN framework for Digital Competencies for Teaching in Science Education.	1. Documentation 2. Presentation 3. Communication/Collaboration 4. Information Search and Evaluation 5. Data Acquisition 6. Data Processing 7. Simulation and Modeling	20 items	Design and validation	Cronbach's Alpha (0.80-0.94)	NM	NM	Yes	CFA	NM	NM	1. Documentation 2. Presentation 3. Communication/Collaboration 4. Information Search and Evaluation 5. Data Acquisition 6. Data Processing 7. Simulation and Modeling	Unrelated	Critical thinking	Collaboration	Communication
26	Kryukova, Nina I;Chistyakov, Alexey A;Shulga, Tatiana I;Omarova, Leyla B;Tkachenko, Tatiana V;Malakhovsky, Alexey K;Babieva, Nigina S	Adaptation of higher education students’ digital skills survey to Russian universities	SI	Sí, el documento describe el instrumento de la encuesta, que evalúa las habilidades digitales de los estudiantes universitarios. Se detallan las etapas de adaptación del instrumento al contexto ruso, incluyendo la traducción, la validación por un panel de expertos, y la validación estadística a través del análisis factorial exploratorio y confirmatorio​	Open Access	2022	EURASIA Journal of Mathematics, Science and Technology Education	https://doi.org/10.29333/ejmste/12558	Kryukova, N. I., Chistyakov, A. A., Shulga, T. I., Omarova, L. B., Tkachenko, T. V., Malakhovsky, A. K., & Babieva, N. S. (2022). Adaptation of higher education students’ digital skills survey to Russian universities. Eurasia Journal of Mathematics, Science and Technology Education, 18(11), em2183.	Digital skills are essential for a technologized society. For younger generations, it has become almost necessary to have such skills. This study focuses on a valid and reliable measurement tool to determine the digital skills of university students. The research was carried out with the participation of a total of 463 university students. Exploratory factor analysis and confirmatory factor analy…	digital skills , undergraduate students , psychometric properties	English	Open Access	2022	Austria	University of Salzburg	Competency Areas of DiKoLAN: Documentation, Presentation, Communication/Collaboration, and Information Search and Evaluation	Technological Pedagogical Content Knowledge , science education , student teachers , self-report measure	Lena von Kotzebue;Meier, Monique;Finger, Alexander;Kremser, Erik;Huwer, Johannes;Lars-Jochen Thoms;Becker, Sebastian;Bruckermann, Till;Thyssen, Christoph	2022	Open Access	Russia and Kazakhstan	Plekhanov Russian University of Economics, Peoples’ Friendship University of Russia, Moscow State Regional University, Financial University Under the Government of the Russian Federation, Moscow Aviation Institute, and I. M. Sechenov First Moscow State Medical University	University students	Digital skills survey, adapted for Russian universities.	1. Access to and management of digital content 2. Digital empathy 3. Use of digital means 4. Digital safety 5. Communication of digital content 6. Creation of digital content	25 items	Adaptation and validation	Cronbach's Alpha (0.985)	NM	NM	Yes	CFA & EFA	NM	NM	1. Access to and management of digital content 2. Digital empathy 3. Use of digital means 4. Digital safety 5. Communication of digital content 6. Creation of digital content	Unrelated	Critical thinking	Unrelated	Communication
27	Kurtz, G., & Peled, Y.	Digital Learning Literacies – A Validation Study	SI	Sí, el documento detalla la investigación de validación de los DLDs y PSs, incluyendo el desarrollo del instrumento utilizado para recopilar datos de los estudiantes sobre su competencia digital​	Open Access	2016	Informing Science and Information Technology	NA	Kurtz, G., & Peled, Y. (2016). Digital Learning Literacies – A Validation Study. Issues in Informing Science and Information Technology, 13, 145-158.	This paper presents a validation research of seven Digital Learning Domains (DLDs) and sixty_x0002_five performance statements (PSs) as perceived by students with experience in learning via ICT. The preliminary findings suggest a statistical firmness of the inventory. The seven DLDs identi_x0002_fied are Social Responsibility, Team-based Learning, Information Research and Retrieval, Infor_x0002_m…	Digital Learning Literacies, 21st Century Skills, Learning Skills	English	Open Access	2016	Israel					2016	Open Access	Israel	Western Galilee College and the College for Academic Studies	University students	New instrument to assess digital literacy skills required for learning, comprising seven Digital Learning Domains (DLDs) and sixty-five performance statements (PSs).	1. Social Responsibility 2. Team-based Learning 3. Information Research and Retrieval 4. Information Management 5. Information Validation 6. Processing and Presentation of Information 8. Digital Integrity	65 items	Design and validation	Cronbach's Alpha (0.71-0.93)	NM	NM	Yes	NM	NM	NM	1. Social Responsibility 2. Team-based Learning 3. Information Research and Retrieval 4. Information Management 5. Information Validation 6. Processing and Presentation of Information 8. Digital Integrity	Unrelated	Critical thinking	Collaboration	Communication
28	Llorente-Cejudo, C., Barragán-Sánchez, R., Puig-Gutiérrez, M., & Romero-Tena, R.	Social inclusion as a perspective for the validation of the "DigCompEdu Check-In" questionnaire for teaching digital competence	SI	Sí, el documento detalla el instrumento de investigación utilizado para el estudio, el cual es el cuestionario 'DigCompEdu Check-In'. Este cuestionario fue diseñado para permitir la auto-reflexión de los educadores sobre su competencia digital y evaluar sus fortalezas y áreas de mejora en el aprendizaje digital​	Open Access	2022	Education and Information Technologies	https://doi.org/10.1007/s10639-022-11273-4	Llorente-Cejudo, C., Barragán-Sánchez, R., Puig-Gutiérrez, M., & Romero-Tena, R. (2023). Social inclusion as a perspective for the validation of the" DigCompEdu Check-In" questionnaire for teaching digital competence. Education and Information Technologies, 28(8), 9437-9458.	Making use of digital technologies and all the possibilities that benefit education is one of the objectives of the European Framework for the Digital Competence of Educators, as well as their potential for personal development and social inclusion, among other aspects. The aim of this study was to validate the «DigCompEdu Check-In» scale as an instrument for the self-reflection of educators rega…	Digital competence; ICT; Social inclusion; Structural equation method; University teaching	English	Open Access	2022	Peru	University of Seville	digital educator competence: 1) professional commitment, 2) digital resources, 3) digital pedagogy, 4) evaluation and feedback, 5) empowering students, and 6) facilitating the digital competence of students	active methodologies; competency framework; digital teaching competence; digital technologies; structural equations model	Martín Párraga L.; Llorente Cejudo C.; Barroso Osuna J.	2022	Open Access	Spain	public universities in Andalusia	Faculty members	DigCompEdu Check-In	1. Professional commitment 2. Digital resources 3. Digital pedagogy 4. Evaluation and feedback 5. Student empowerment 6. Facilitating student digital competence	22 items	Validation	McDonald’s (0.946)	NM	NM	Yes	CFA & EFA	NM	NM	1. Professional commitment 2. Digital resources 3. Digital pedagogy 4. Evaluation and feedback 5. Student empowerment 6. Facilitating student digital competence	Unrelated	Critical thinking	Unrelated	Communication
29	Martín Párraga L.; Llorente Cejudo C.; Barroso Osuna J.	Validation of the DigCompEdu Check-in Questionnaire through Structural Equations: A Study at a University in Peru	SI	Sí, el documento describe detalladamente el instrumento utilizado para el estudio, el cuestionario DigCompEdu Check-in, que se basa en el Marco Europeo de Competencia Digital para Educadores (DigCompEdu). Este instrumento se compone de 22 ítems distribuidos en seis áreas de competencia y se empleó para evaluar la competencia digital de los profesores universitarios en Perú​	Open Access	2022	Education sciences	https://doi.org/10.3390/educsci12080574	Martín Párraga, L., Llorente Cejudo, C., & Barroso Osuna, J. (2022). Validation of the DigCompEdu Check-in Questionnaire through Structural Equations: A Study at a University in Peru. Education Sciences, 12(8), 574.	The technologization of society presents a great challenge for education in the twenty-first century; there is a need to face that challenge to be able to promote quality digital literacy. The use of the teacher’s digital competence in terms of the safe and critical use of technologies is one of the key competencies that can guarantee educational success. The present study analyzes the reliabilit…	active methodologies; competency framework; digital teaching competence; digital technologies; structural equations model	English	Open Access	2022	Spain	Universidad de Salamanca	information literacy	secondary education; teacher education; evaluation; information literacy; digital competence; educational innovation	Martinez-Abad, F; Bielba-Calvo, M; Herrera-Garcia, ME	2022	Open Access	Peru	Continental University of Peru	Professors	DigCompEdu Check-In	1. Professional Engagement 2. Digital Resources 3. Teaching and Learning 4. Assessment 5. Empowering Learners 6. Facilitating Students' Digital Competence	22 items	Validation	Cronbach's Alpha (0.950)	NM	NM	Yes	CFA & EFA	Yes	NM	1. Professional commitment 2. Digital resources 3. Digital pedagogy 4. Evaluation and feedback 5. Student empowerment 6. Facilitating student digital competence	Unrelated	Critical thinking	Unrelated	Communication
30	Mateus, Julio-César;Hernández, Wilson	Design, Validation, and Application of a Questionnaire on Media Education for Teachers in Training	SI	Sí, el documento incluye tanto las preguntas específicas de investigación como el instrumento completo del estudio. El cuestionario se diseñó para evaluar las percepciones de los futuros docentes sobre la educación mediática, incluyendo su conocimiento, actitudes y razonamiento sobre el tema .	Open Access	2019	Journal of New ApprOpen Accessches in Educational Research (NAER Journal)	https://doi.org/10.7821/naer.2019.1.329	Mateus, J. C., & Hernández-Breña, W. (2019). Design, validation, and application of a questionnaire on media education for teachers in training. Journal of New ApprOpen Accessches in Educational Research (NAER Journal), 8(1), 34-41.	Este artículo detalla el proceso de diseño, validación y aplicación (N=501) de un cuestionario ad-hoc que mide conocimientos, actitudes y razonamientos de docentes en formación peruanos sobre educación mediática. En cuanto al método, se aplicaron diversas técnicas de validación psicométrica y se analizaron los resultados a partir de estadísticas descriptivas. Los resultados mostraron el alto nive…		English , Spanish	Open Access	2019	Mexico	Universidad Autónoma de Ciudad Juárez	Alfabetización informacional: organizacional, pedagógica, actitudinal	Alfabetización informacional , Alfin , Educación superior , Universidad , Modelo de evaluación , Evalfin , Indicadores , Information literacy , University , Higher education , Evaluation model , Indicators	Mears-Delgado, Berenice;Miguel-Ángel Marzal	2019	Open Access	Peru and Spain	Pontifical Catholic University of Peru, Cayetano Heredia Peruvian University, Ruiz de Montoya University, and the Monterrico National Pedagogical Institute	University students	Questionnaire on Media Education Knowledge, Attitudes and Reasoning	1. Knowledge of Media Education 2. Attitudes on Media Education in teacher education 3. Reasons to Integrate Media Education into Schools	15 items	Design and validation	Cronbach's Alpha (0.816)	NM	NM	Yes	CFA	NM	NM	1. Knowledge of Media Education 2. Attitudes on Media Education in teacher education 3. Reasons to Integrate Media Education into Schools	Unrelated	Critical thinking	Unrelated	Communication
31	Organista-Sandoval, J., Lavigne, G., Serrano-Santoyo, A., & Sandoval-Silva, M.	Desarrollo de un cuestionario para estimar las habilidades digitales de estudiantes universitarios	SI	Sí, el documento detalla tanto las preguntas específicas de investigación como el instrumento completo del estudio. El propósito era desarrollar un cuestionario para estimar las habilidades digitales con propósito educativo de los estudiantes de una universidad pública mexicana. Se describen las cuatro dimensiones del cuestionario: manejo de información, comunicación, organización, y tecnología p…	Limited	2017	Revista Complutense de Educación	https://doi.org/10.5209/rev_RCED.2017.v28.n1.49802	Organista Sandoval, J., Lavigne, G., Serrano Santoyo, A., & Sandoval Silva, M. (2017). Desarrollo de un cuestionario para estimar las habilidades digitales de estudiantes universitarios. Revista Complutense de educación.	The purpose of this article is to show the methodological route carried out to develop a questionnaire to estimate the educational digital skills of students of a Mexican public university as well as to show evidence of construct validity through structural equation modeling. The development of a questionnaire based on four dimensions is described: management of information, communication, organi…		Spanish	Limited	2017	Mexico	Universidad Autónoma de Baja California, Centro de Investigación Científica y de Educación Superior de Ensenada, CICESE	Digital skills: management of information, communication, organization and portable technology	information skills; data processing; technological education; statistical analysis	Organista-Sandoval, Javier;Lavigne, Gilles;Serrano-Santoyo, Arturo;Sandoval-Silva, Maribel	2017	Limited	Mexico	Universidad Autónoma de Baja California, Centro de Investigación Científica y de Educación Superior de Ensenada, CICESE	University students	New instrument to estimate the digital skills of students.	1. Management of Information 2. Management of Communication 3. Portable Technology Management 4. Organization	30 items	Design and validation	Cronbach's Alpha (0.94)	NM	NM	Yes	SEM	NM	NM	1. Management of Information 2. Management of Communication 3. Portable Technology Management 4. Organization	Unrelated	Critical thinking	Unrelated	Communication
32	Peled, Y., Kurtz, G., & Avidov-Ungar, O.	Pathways to a Knowledge Society: A Proposal for a Hierarchical Model for Measuring Digital Literacy Among Israeli pre-service Teachers	SI	Sí, el documento detalla el desarrollo y validación de un conjunto ajustado de 54 afirmaciones de desempeño, que se categorizaron en siete dominios de aprendizaje digital. Estos dominios fueron validados mediante modelado de ecuaciones estructurales y luego confirmados por análisis factorial, utilizando el software AMOS​	Limited	2021	The Electronic Journal of e-Learning	https://doi.org/10.34190/ejel.19.3.2217	Peled, Y., Kurtz, G., & Avidov-Ungar, O. (2021). Pathways to a knowledge society: A proposal for a hierarchical model for measuring digital literacy among israeli pre-service teachers. Electronic Journal of e-Learning, 19(3), pp118-132.	This paper presents the results of an empirical study on validation of performance statements for an inventory of the digital literacy skills required for learning. These skills are used to determine digital readiness of pre-service teachers. The paper reports on validation of an adjusted set of 54 performance statements which were categorized into seven digital learning domains. The seven digita…	digital literacies; digital readiness; students majoring in education; higher education	English	Limited	2021	Israel	Western Galilee College	Digital Learning Domains (DLDs): (A) Information Collection; (B) Information Evaluation; (C) Information Management; (D) Information Processing; (E) Teamwork; (F) Integrity Awareness; and (G) Social Responsibility	digital literacies; digital readiness; students majoring in education; higher education	Peled, Y; Kurtz, G; Avidov-Ungar, O	2021	Limited	Israel	Western Galilee College, Holon Institute of Technology, and Achva Academic College	University students	Self-Report Digital Literacies (SRDL) survey	1. Information Collection 2. Information Evaluation 3. Information Management 4. Information Processing 5. Teamwork 6. Integrity Awareness 7. Social Responsibility	46 items	Design and validation	Cronbach's Alpha (0.888-0.939)	NM	NM	Yes	SEM & CFA	NM	NM	1. Information Collection 2. Information Evaluation 3. Information Management 4. Information Processing 5. Teamwork 6. Integrity Awareness 7. Social Responsibility	Unrelated	Critical thinking	Collaboration	Communication
33	Ramírez-Armenta, M. O., García-López, R. I., & Edel-Navarro, R.	Validation of a scale to measure digital competence in graduate students	SI	El estudio desarrolló y validó una escala para medir la competencia digital aplicada al proceso investigativo en estudiantes de posgrado. La escala se construyó a partir de entrevistas con 51 investigadores y posteriormente se aplicó a 323 estudiantes de diversos programas educativos para evaluar las categorías de competencia digital: competencia informacional y uso de herramientas tecnológicas​	Open Access	2021	Formación universitaria	http://dx.doi.org/10.4067/S0718-50062021000300115	Ramírez-Armenta, M. O., García-López, R. I., & Edel-Navarro, R. (2021). Validación de una escala para medir la competencia digital en estudiantes de posgrado. Formación universitaria, 14(3), 115-126.	The objective of the present study is to develop a valid and reliable scale to measure digital competence, applied to the research process, in research-oriented graduate students. A two-phase mixed method is used. In the first phase (qualitative), 51 researchers, known by their trajectory at national level, are interviewed to determine dimensions involved in research competence. In the second pha…	digital competence; higher education; measurement reliability; postgraduate	English	Open Access	2021	Mexico	Instituto Tecnológico de Sonora	Competencia digital: alfabetizacipon informacional, uso de tecnología	digital competence; higher education; measurement reliability; postgraduate	Ramírez-Armenta M.O.; García-López R.I.; Edel-Navarro R.	2021	Open Access	Mexico	Instituto Tecnológico de Sonora (ITSON) and Universidad Veracruzana	Graduate students	New instrument to measure digital competence in research	1. Information Competence 2. Use of Technological Tools	14 items	Design and validation	Cronbach's Alpha & McDonald’s (0.847-0.878)	NM	NM	Yes	CFA & EFA	NM	NM	1. Information Competence 2. Use of Technological Tools	Unrelated	Unrelated	Unrelated	Communication
34	Restrepo-Palacio S.; de María Segovia Cifuentes Y.	Design and validation of an instrument for the evaluation of digital competence in Higher Education	SI	Sí, el documento incluye las preguntas específicas de investigación y el instrumento completo del estudio. Describe la construcción y validación del Cuestionario para el Estudio de la Competencia Digital del Alumnado de Educación Superior (CDAES), desarrollado para evaluar la percepción de los estudiantes universitarios sobre su propia competencia digital. El cuestionario presenta una estructura …	Limited	2020	Ensaio: Avaliação e Políticas Públicas em Educação	https://doi.org/10.1590/s0104-40362020002801877	Restrepo-Palacio, S., & Cifuentes, Y. D. M. S. (2020). Design and validation of an instrument for the evaluation of digital competence in Higher Education. Ensaio: Avaliação e Políticas Públicas em Educação, 28(109), 932-961.	The objective is to present the results of the design and validation of the “Digital Campus” instrument, which assesses the level of development of digital competence in Higher Education students. It is based on the conceptual framework of digital competence and the revision of instruments to diagnose the level of development in this population. A questionnaire of 25 questions was designed and ap…	Digital competence; Digital literacy; Higher Education; Instrument design; Validation of instruments	English	Limited	2020	Colombia	Universidad de La Sabana	Digital competence: dimension informacional, comunicativa, tecnologica, ciudadania digital	Digital competence; Digital literacy; Higher Education; Instrument design; Validation of instruments	Restrepo-Palacio S.; de María Segovia Cifuentes Y.	2020	Limited	Colombia	Universidad de La Sabana	Graduate students	Campus Digital	1. Informational Dimension 2. Communicational Dimension 3. Digital Citizenship Dimension 4. Technological Dimension	25 items	Design and validation	NM	NM	NM	Yes	NM	Yes	NM	1. Informational Dimension 2. Communicational Dimension 3. Digital Citizenship Dimension 4. Technological Dimension	Unrelated	Unrelated	Collaboration	Communication
35	Revuelta-Domínguez, F.-I., Suárez-Guerrero, C., Rivero-Panaqué, C., & Cartagena-Beteta, M.-A.	Adaptation of the questionnaire for the assessment of digital competencies in higher education	SI	Sí, el documento describe el proceso de adaptación y validación del Cuestionario de Competencias Digitales en Educación Superior (CDES), incluyendo la descripción del instrumento y las etapas de su adaptación y validación para el contexto peruano. Se especifica que el cuestionario final consiste en 62 ítems, distribuidos en seis secciones, y se menciona su estructura y contenido​	Open Access	2023	Aula abierta	NA	Revuelta-Domínguez, F. I., Suárez-Guerrero, C., Rivero-Panaqué, C., & Cartagena-Beteta, M. A. (2023). Adaptación del cuestionario de valoración de competencias digitales en educación superior. Aula Abierta, 52(2), 117-125.	In this study, we present research conducted in Peru involving the Beca 18 student population from the Ministry of Education, a social aid program provided by the Peruvian government to high-performing students in the country. The research aims to provide a psychometric apprOpen Accessch to the Digital Competency Questionnaire in Higher Education (CDES) for this population, as well as its cross-c…	Digital competences; high-performance; higher education; validation	Spanish	Open Access	2023	Chile	Universidad Autónoma de Chile	Áreas del marco común de competencia digital docente 2017: Información y alfabetización informacional, Comunicación y colaboración, Creación de contenido digital, Seguridad, Resoluación de problemas	Factorial analysis; Information and communication technologies; Questionnaire; University teaching	Riquelme-Plaza I.; Cabero-Almenara J.; Marín-Díaz V.	2023	Open Access	Peru	Universidad de Extremadura in Spain, Universitat de València in Spain, and Pontificia Universidad Católica	University students	Digital Competency Questionnaire in Higher Education (CDES)	1. General Information 2. Technological Literacy 3. Access and Use of Information 4. Communication and Collaboration 5. Digital Citizenship 6. Creativity and Innovation	62 items	Adaptation and validation	Cronbach's Alpha & McDonald’s (0.970-0.972)	NM	NM	Yes	CFA & EFA	NM	NM	1. General Information 2. Technological Literacy 3. Access and Use of Information 4. Communication and Collaboration 5. Digital Citizenship 6. Creativity and Innovation	Unrelated	Unrelated	Collaboration	Communication
36	Riquelme-Plaza, I., Cabero-Almenara, J., & Marín-Díaz, V.	Validación del cuestionario de Competencia Digital Docente en profesorado universitario chileno	SI	Sí, el estudio incluyó la adaptación y validación del "Cuestionario de competencia digital docente" para el contexto de la educación superior en Chile, proporcionando detalles sobre el instrumento utilizado​	Open Access	2022	Revista Electrónica Educare (Educare Electronic Journal)	http://dx.doi.org/10.15359/ree.26-1.9	Riquelme-Plaza, I., Cabero-Almenara, J., & Marín-Díaz, V. (2022). Validation of the digital teaching competence questionnaire in chilean university Teachers. Revista Electrónica Educare, 26(1), 165-179.	Objective. Nowadays, university teachers must develop competencies to offer quality education, including digital competence. This study aimed to validate the "Teaching Digital Competence Questionnaire" in the scale of use for the context of higher education in Chile. Method. The method is quantitative, an ex-post factum study. The sample was of 1,122 teachers. Results. The results reveal that the…	Factorial analysis; Information and communication technologies; Questionnaire; University teaching	Spanish	Open Access	2022	Peru	Universidad de Extremadura, Universitat de València, Pontificia Universidad Católica del Perú, Pontificia Universidad Católica del Perú y Universidad San Ignacio de Loyola	Digital competence	Digital competences; high-performance; higher education; validation	Rivero-Panaqué C.; Revuelta-Domínguez F.-I.; Cartagena-Beteta M.-A.; Suárez-Guerrero C.	2022	Open Access	Chile	Universidad Autónoma de Chile	Professors	Cuestionario de Competencia Digital Docente (CDD)	1. Information and information literacy. 2. Communication and collaboration. 3. Digital content creation. 4. Safety. 5. Problem-solving.	20 items	Adaptation and validation	Cronbach's Alpha (0.979)	NM	NM	NM	CFA	NM	NM	1. Information and information literacy. 2. Communication and collaboration. 3. Digital content creation. 4. Safety. 5. Problem-solving.	Unrelated	Critical thinking	Collaboration	Communication
37	Romero Esquinas, M. H., Muñoz González, J. M., Hidalgo Ariza, M. D., & Ariza Carrasco, C.	Validation of a questionnaire on habits and uses of social networks in students of an Andalusian university	SI	Sí, el documento detalla un instrumento completo de investigación, que es un cuestionario diseñado ad-hoc para evaluar los usos y hábitos de las redes sociales entre los estudiantes universitarios. Este cuestionario incluye un total de 16 ítems distribuidos en tres dimensiones: Valoración del uso personal de las redes sociales, El juego en internet, y Repercusión del uso de las Redes Sociales​	Open Access	2023	Aula abierta	http://dx.doi.org/10.17811/rifie.52.2.2023.109-116	Esquinas, M. H. R., González, J. M. M., Ariza, M. D. H., & Carrasco, C. A. (2023). Validación de un cuestionario sobre hábitos y usos de las redes sociales en los estudiantes de una universidad andaluza. Aula Abierta, 52(2), 109-116.	The age of communication has achieved new ways of behaving and communicating with others. Although the use of ICT has pro-gressed in the society in which we live, today the proper use of these is questioned, especially among adolescent students. The objective of this study is to validate a questionnaire created ad-hoc about the uses and habits that students of an Andalusian university make of soc…	Information and Communication Technology; questionnaire; factorial analysis; higher education	English	Open Access	2023	Spain	Universidad de Córdoba	Valoración del uso personal de las redes sociales, el juego en internet, repercusión del uso de las redes sociales	Information and Communication Technology; questionnaire; factorial analysis; higher education	Esquinas, MHR; Ariza, MDH; Gonzalez, JMM; Carrasco, CA	2023	Open Access	Spain	University of Córdoba and the University of Almería	University students	New questionnaire on habits and uses of social networks among future education professionals	1. Personal use of social networks 2. Internet gaming 3. Impact of Social Network Use	26 items	Design and validation	Cronbach's Alpha (0.826)	NM	NM	NM	CFA & EFA	NM	NM	1. Personal use of social networks 2. Internet gaming 3. Impact of Social Network Use	Unrelated	Unrelated	Unrelated	Communication
38	Sarango-Lapo, C. P., Mena, J., Ramírez-Montoya, M.-S., & Real, E.	La escala de Competencia Digital y uso de Recursos Educativos Abiertos (CD-REA): factores asociados a la competencia de los docentes universitarios bimodales	SI	El estudio detalla el uso de la escala CD-REA para medir la competencia digital de los docentes universitarios bimodales, incluyendo las subescalas y el proceso psicométrico para validar la escala. Sin embargo, no proporciona una lista detallada de las preguntas específicas utilizadas	Open Access	2020	Revista Ibérica de Sistemas e Tecnologias de Informação	NA	Sarango-Lapo, C. P., Mena, J., Ramírez-Montoya, M. S., & Real, E. (2020). La escala de Competencia Digital y uso de Recursos Educativos Abiertos (CD-REA): factores asociados a la competencia de los docentes universitarios bimodales. Revista Ibérica De Sistemas e Tecnologias De Informação, (E28), 545-558.	Palabras-clave: competencia digital docente; recurso educativo abierto; análisis factorial; validez de constructo; análisis de varianza Abstract: In this research, the CD-REA scale is employed to measure the digital competence of information and use of OER and figure out which factors are associated to the digital competence in a sample of 271 bimodal (teaching both in classic and distance learni…		Spanish	Open Access	2020	Portugal	Universidade de LisbOpen Access, Pontifícia Universidade Católica de São Paulo	teacher digital competence	Digital Competence; Higher Education; Information and Communication Technologies	Santos, CC; Pedro, NSG; Mattar, J	2020	Open Access	Ecuador, Spain, and Mexico	Universidad Técnica Particular de Loja, Universidad de Salamanca and Universidad de Santiago de Compostela, and Tecnológico de Monterrey	Professors	CD-REA Scale (Digital Competence and Use of Open Educational Resources Scale)	1. Competence in searching, selecting, and evaluating information 2. Competence in storage and retrieval of information 3. Competence in communication and dissemination of information 4. Competence in the use of OER (Open Educational Resources)	16 items	Design and validation	NM	NM	NM	NM	CFA	NM	NM	1. Competence in searching, selecting, and evaluating information 2. Competence in storage and retrieval of information 3. Competence in communication and dissemination of information 4. Competence in the use of OER (Open Educational Resources)	Unrelated	Critical thinking	Unrelated	Communication
39	Silva Monsalve, A. M., Martínez Morales, E. M., Ortega Ferreira, S. C., Mejía Corredor, C., & Maldonado Currea, A.	Estudio sobre competencias digitales en programas de formación virtual y a distancia	SI	Sí, el documento describe el uso de un instrumento para la validación de competencias digitales, aplicado a estudiantes de dos universidades, y basado en un marco conceptual situado en seis dimensiones. Aunque el resumen proporcionado no detalla todas las preguntas específicas del instrumento, menciona su aplicación y los aspectos evaluados	Open Access	2021	CIENCIA ergo-sum, Revista Científica Multidisciplinaria de Prospectiva	https://doi.org/10.30878/ces.v28n3a4	Silva Monsalve, A. M., Martínez Morales, E. M., Ortega Ferreira, S. C., Mejía Corredor, C., & Maldonado Currea, A. (2021). Estudio sobre competencias digitales en programas de formación virtual ya distancia. CIENCIA ergo-sum: revista científica multidisciplinaria de la Universidad Autónoma del Estado de México, 28(3), 1-15.	The strengths and weaknesses in technological management for programs in virtual and remote modalities are examined, because the digital skills have become a necessary skill for education in the 21st century. Methodologically, a mixed research and a literature review are carried out to establish a conceptual reference on digital skills. An instrument was identified for its validation, which was a…	Digital competences; open education; technological education; basic skills; online training	Spanish	Open Access	2021	Ecuador	Universidad Técnica Particular de Loja	CD-REA: 1) Competencias de búsqueda, selección y evaluación de la información, 2) Competencias de almacenamiento y recuperación de la información, 3) Competencias en la comunicación y difusión de la información, y 4) Competencias en el uso de REA.	teacher digital competences; open educational resources; factor analysis; construct validity; variance analysis	Sarango-Lapo, Celia Paola;Mena, Juanjo;Ramírez-Montoya, María-Soledad;Real, Eulogio	2021	Open Access	Colombia	Santo Tomás University and the School of Business Administration	University students	New instrument for the digital competence of university students based on Gutiérrez Castillo et al. (2017).	1. Technological Literacy (Functioning and concepts of ICT) 2. Information Search and Processing (Research and information management) 3. Critical Thinking, Problem Solving, and Decision Making 4. Communication and Collaboration 5. Digital Citizenship 6. Creativity and Innovation	43 items	Design and validation	NM	NM	NM	Yes	NM	NM	NM	1. Technological Literacy (Functioning and concepts of ICT) 2. Information Search and Processing (Research and information management) 3. Critical Thinking, Problem Solving, and Decision Making 4. Communication and Collaboration 5. Digital Citizenship 6. Creativity and Innovation	Unrelated	Critical thinking	Collaboration	Communication
40	Tang, Lin;Gu, Jianjun;Xu, Jinlei	Constructing a Digital Competence Evaluation Framework for In-Service Teachers’ Online Teaching	SI	Sí, el documento incluye las preguntas de investigación específicas y el instrumento completo del estudio. El objetivo fue construir un marco de evaluación de competencia digital confiable para docentes en servicio durante la enseñanza en línea. El estudio desarrolló y validó una escala compuesta por 35 ítems distribuidos en 10 factores relacionados con la competencia digital del docente.	Open Access	2022	Sustainability	https://doi.org/10.3390/su14095268	Tang, L., Gu, J., & Xu, J. (2022). Constructing a Digital Competence Evaluation Framework for In-Service Teachers’ Online Teaching. Sustainability, 14(9), 5268.	The focus on online teaching and teachers’ digital competence (DC) has reached a new level following the emergence of COVID-19 and its dramatic influence on the educational industry, requiring teachers to be equipped with DC. However, there is no consensus on the measuring framework of teachers’ DC. Therefore, this study aimed to construct a reliable self-evaluation framework for in-service teach…	teachers’ digital competence , evaluation framework , online teaching , in-service teachers	English	Open Access	2022	China	Nanjing Normal University	teacher digital competence: learner knowledge, technological knowledge, pedagogicl knowledge, ethical knowledge, learner technological knowledge, learner pedagogical knowledge, learner ethical knowledge, tecnological pedagogical knowledge, technological ethical knowledge, pedagogical ethical knowledge	teachers’ digital competence , evaluation framework , online teaching , in-service teachers	Tang, Lin;Gu, Jianjun;Xu, Jinlei	2022	Open Access	China	Nanjing Normal University	Professors	New instrument based on the Teachers’ Digital Competence	1. Technical Knowledge (TK) 2. Learner Knowledge (LK) 3. Pedagogical Knowledge (PK) 4. Ethical Knowledge (EK) 5. Learner Technical Knowledge (LTK) 6. Learner Pedagogical Knowledge (LPK) 7. Learner Ethical Knowledge (LEK) 8. Technical Pedagogical Knowledge (TPK) 9. Technical Ethical Knowledge (TEK) 10. Pedagogical Ethical Knowledge (PEK)	35 items	Design and validation	Cronbach's Alpha (0.974)	NM	NM	Yes	CFA & EFA	NM	NM	1. Technical Knowledge (TK) 2. Learner Knowledge (LK) 3. Pedagogical Knowledge (PK) 4. Ethical Knowledge (EK) 5. Learner Technical Knowledge (LTK) 6. Learner Pedagogical Knowledge (LPK) 7. Learner Ethical Knowledge (LEK) 8. Technical Pedagogical Knowledge (TPK) 9. Technical Ethical Knowledge (TEK) 10. Pedagogical Ethical Knowledge (PEK)	Unrelated	Critical thinking	Unrelated	Unrelated
41	Tomczyk, Ł.	Declared and Real Level of Digital Skills of Future Teaching Staff	SI	Sí, el documento incluye tanto las preguntas específicas de investigación como el instrumento completo del estudio. El estudio tenía como objetivo mostrar el nivel real y declarado de habilidades digitales entre el futuro personal docente, utilizando una triangulación de métodos y técnicas de investigación, incluyendo una encuesta diagnóstica y pruebas de competencia relacionadas con el uso de pr…	Open Access	2021	Education sciences	https://doi.org/10.3390/educsci11100619	Tomczyk, Ł. (2021). Declared and real level of digital skills of future teaching staff. Education Sciences, 11(10), 619.	Digital competence is undoubtedly one of the key skills that teaching staff should possess. Currently, there are many theoretical frameworks and ways to measure skills and knowledge related to the use of information and communication technologies (ICT). This article is an attempt to show the real and declared level of digital skills among future teaching staff. The research was conducted in Polan…	digital competence , digital skills , preservice teachers , Poland , ECDL , knowledge test , skills test	English	Open Access	2021	Poland	Pedagogical University of Cracow	digital skills: word-self-evaluation, excel-self-evaluation, access-self-evaluation, theory-slef-evaluation-theorical test ECDL. Word ECDL, excel ECDL	digital competence , digital skills , preservice teachers , Poland , ECDL , knowledge test , skills test	Tomczyk, Łukasz	2021	Open Access	Poland	Pedagogical University of Cracow	University students	European Computer Skills Certificate (ECDL)	1. Operation of digital devices and knowledge of IT equipment (theoretical test) 2. Use of word processing software 3. Spreadsheet maintenance	18 items	Adaptation and validation	Cronbach's Alpha (0.720)	NM	NM	Yes	EFA	NM	NM	1. Operation of digital devices and knowledge of IT equipment (theoretical test) 2. Use of word processing software 3. Spreadsheet maintenance	Unrelated	Critical thinking	Unrelated	Unrelated
42	Tourón, J., Martín, D., Navarro, E., Pradas, S., & Íñigo, V.	Construct validation of a questionnaire to measure teachers' digital competence (TDC)	SI	Sí, el documento detalla tanto las preguntas específicas de investigación como el instrumento completo del estudio, el cual se desarrolló para evaluar la competencia digital de los docentes de acuerdo con el marco establecido por INTEF. El proceso de validación utilizó una muestra de 426 docentes y se realizó en línea, alcanzando una fiabilidad total del instrumento estimada con el Alpha de Cronb…	Open Access	2018	Revista Española de Pedagogía	http://dx.doi.org/10.22550/REP76-1-2018-02	Touron, J., Martín, D., Navarro, E., Pradas, S., & Inigo, V. (2018). Construct validation of a questionnaire to measure teachers’ digital competence (TDC). Revista española de pedagogía, 76(269), 25-54.	Teachers' digital competencies have become an essential aspect of training teachers to promote learning in their students that moves away from the knowledge transfer model and moves towards a talent development model. This work validates an instrument developed by the authors to evaluate the digital competency of teachers, in accordance with the current framework established by INTEF. A sample of…	teachers' digital competence; construct validity; convergent validity; discriminant validity; online questionnaires	Spanish	Open Access	2018	Spain	Universidad Internacional de La Rioja (UNIR), Complutense University of Madrid	teacher digital competence: IT information and literacy, communication and collaboration, creating digital content, security, troubleshooting	teachers' digital competence; construct validity; convergent validity; discriminant validity; online questionnaires	Touron, J; Martin, DR; Navarro Asencio, E; Pradas, S; Inigo, V	2018	Open Access	Spain	Universidad Internacional de La Rioja (UNIR), Complutense University of Madrid	Professors	Teachers’ Digital Competencies Questionnaire (TDC)	1. Information and communication 2. Communicating and collaborating 3. Creating digital content 4. Security 5. Troubleshooting	54 items	Design and validation	Cronbach's Alpha (0.974)	NM	NM	Yes	CFA & EFA	NM	NM	1. Information and communication 2. Communicating and collaborating 3. Creating digital content 4. Security 5. Troubleshooting	Creativity	Unrelated	Collaboration	Communication
43	Tzafilkou K.; Perifanou M.; Economides A.A.	Development and validation of students’ digital competence scale (SDiCoS)	SI	Sí, el documento incluye el instrumento completo del estudio, compuesto por 28 ítems que abarcan seis componentes de competencia digital. Estos ítems se evalúan utilizando una escala tipo Likert de cinco puntos, cubriendo habilidades en áreas como la búsqueda, el acceso, la colaboración en línea, la gestión de la seguridad y la protección de datos	Open Access	2022	International Journal of Educational Technology in Higher Education	https://doi.org/10.1186/s41239-022-00330-0	Tzafilkou, K., Perifanou, M., & Economides, A. A. (2022). Development and validation of students’ digital competence scale (SDiCoS). International Journal of Educational Technology in Higher Education, 19(1), 30.	Towards the transition to blended and remote education, evaluating the levels of students’ digital competence and designing educational programs to advance them is of paramount importance. Existing validated digital competence scales usually ignore either important digital skills needed or new socio-technological innovations. This study proposes and validates a comprehensive digital competence sc…	Adult learning; Digital competence; Digital skills; Scale development; Twenty-first century skills	English	Open Access	2022	Greece	University of Macedonia	Digital skills: (i) Access, Search and Find, (ii) Use, Store, Manage, Evaluate and Delete, (iii) Communicate, Collaborate, and Share, and (iv) Create, Apply, Modify, Combine, Solve and Protect	Adult learning; Digital competence; Digital skills; Scale development; Twenty-first century skills	Tzafilkou K.; Perifanou M.; Economides A.A.	2022	Open Access	Greece	University of Macedonia	University students	Students’ Digital Competence Scale (SDiCoS)	1. Search, Find, Access 2. Develop, Apply, Modify 3. Communicate, Collaborate, Share 4. Store, Manage, Delete 5. Evaluate 6. Protect	28 items	Design and valitation	NM	NM	NM	NM	EFA	NM	NM	1. Search, Find, Access 2. Develop, Apply, Modify 3. Communicate, Collaborate, Share 4. Store, Manage, Delete 5. Evaluate 6. Protect	Unrelated	Critical thinking	Collaboration	Communication
44	Üstündağ, M. T., Güneş, E., & Bahçivan, E.	Turkish Adaptation of Digital Literacy Scale and Investigating Pre-service Science Teachers' Digital Literacy	SI	Sí, el documento detalla el instrumento de evaluación utilizado para el estudio, que es una escala de alfabetización digital desarrollada originalmente por Ng (2012), adaptada al turco. La escala fue validada y aplicada a 979 profesores de ciencias en formación previa al servicio de 13 universidades estatales turcas​	Open Access	2017	Journal of Education and Future	NA	Ustundag, M. T., Gunes, E., & Bahçivan, E. (2017). Turkish adaptation of digital literacy scale and investigating pre-service science teachers' digital literacy.	The shortest description of digital literacy is the one made by Eshet-Alkalai (2004) as; "survival skill in the digital era". According to Ng (2012) the indicator of an individual's being digital literate is her/his adaptation to the new or emerging technologies. Therefore, it is important for the 21st century humanity to develop digital literacy skills. Today, countries are aware of the fact tha…		English	Open Access	2017	Netherlands	University of Twente & Erasmus University Rotterdam	Information evaluation Information management Communication expressiveness Communication sharing Communication building Communication networking Collaboration Critical thinking Creativity Problem solving	21st-Century skills; Digital skills; Scale construction; Workforce	van Laar E.; van Deursen A.J.A.M.; van Dijk J.A.G.M.; de Haan J.	2017	Open Access	Turkey	Gazi University	University students	Digital Literacy Scale (DLS), originally developed by Ng (2012) and adapted into Turkish for this study.	1. Technical 2. Cognitive 3. Social 4. Attitude	17 items	Adaptaion and validation	Cronbach's Alpha (0.86)	NM	NM	Yes	EFA	NM	NM	1. Technical 2. Cognitive 3. Social 4. Attitude	Unrelated	Critical thinking	Unrelated	Unrelated
45	Van Deursen, A. J. A. M., Helsper, E. J., & Eynon, R.	Development and validation of the Internet Skills Scale (ISS)	SI	Sí, el documento presenta un instrumento completo desarrollado y validado para medir habilidades en Internet, incluyendo detalles sobre la conceptualización de las habilidades, las entrevistas cognitivas para refinar el instrumento, y los resultados de las encuestas piloto y completas utilizadas para validar la escala​	Open Access	2016	Information, Communication & Society	http://dx.doi.org/10.1080/1369118X.2015.1078834	Van Deursen, A. J. A. M., Helsper, E. J., & Eynon, R. (2016). Development and validation of the Internet Skills Scale (ISS). Information, Communication & Society, 19(6), 804-823. http://dx.doi.org/10.1080/1369118X.2015.1078834	Although a number of instruments have been used to measure Internet skills in nationally representative surveys, there are several challenges with the measures available: incompleteness and over-simplification, conceptual ambiguity, and the use of self_x0002_reports. Here, we aim to overcome these challenges by developing a set of reliable measures for use in research, practice, and policy evalua…	NA	English	Open Access	2016	Netherlands					2016	Open Access	Greece	University of Macedonia	University students	Internet Skills Scale (ISS)	1. Operational 2. Navigation 3. Information 4. Social 5. Creative 6. Mobile	35 items	Design and validation	Cronbach's Alpha (0.86-0.90)	NM	NM	Yes	CFA & EFA	NM	NM	1. Operational 2. Navigation 3. Information 4. Social 5. Creative 6. Mobile	Unrelated	Critical thinking	Unrelated	Communication
46	Zhao, Y., Sánchez Gómez, M.C., Pinto Llorente, A.M., & Zhao, L.	Digital Competence in Higher Education: Students' Perception and Personal Factors	SI	Sí, el documento describe el uso de un cuestionario adaptado de un cuestionario diagnóstico para estudiantes universitarios presentado por Martínez Vidal y Cervera, y la herramienta de autoevaluación Ikanos del proyecto Ikanos, como instrumento completo del estudio. El cuestionario consta de 70 ítems divididos en seis secciones, abordando áreas como la disponibilidad de recursos TIC, el potencial…	Open Access	2021	Sustainability	https://doi.org/10.3390/su132112184	Zhao, Y., Sánchez Gómez, M. C., Pinto Llorente, A. M., & Zhao, L. (2021). Digital competence in higher education: Students’ perception and personal factors. Sustainability, 13(21), 12184.	University students are expected to have the appropriate digital competence to face the demands of the changing educational model and to meet the challenges of the future work. This paper describes university students' perceptions of digital competence and analyzes the impact of personal factors on digital competence in a sample of 5164 students from all majors in the first and fourth year of the…	digital competence; students; higher education; ICT	English	Open Access	2021	China	University of Salamanca	Digital competence: Availability of ICT resources, potencial for digital competence development, ICT and digital related traiing, self-perception in digital competence, attitude	digital competence; students; higher education; ICT	Zhao, Y; Gomez, MCS; Llorente, AMP; Zhao, LP	2021	Open Access	China	Gansu Agricultural University	University students	Cuestionario TIC. Valoración de las competencias TIC developed by Martínez et al. (2010)	1. Availability of ICT resources and device 2. Potential for digital competence development 3. ICT and digital related training 4. Self-perception in digital competence 5. Attitude	70 items	Adaptation and validation	Cronbach's Alpha (0.978)	NM	NM	Yes	CFA & EFA	NM	NM	1. Availability of ICT resources and device 2. Potential for digital competence development 3. ICT and digital related training 4. Self-perception in digital competence 5. Attitude	Unrelated	Critical thinking	Unrelated	Unrelated

## Sheet: Sugerencia1
Campo1	Cuenta de Campo1
University students	24
Professors	18
Graduate students	2
University students and professors	1
Total general	45
